# Supplementary material for: Distinct Early Molecular Responses to Mutations Causing vLINCL and JNCL Presage ATP Synthase Subunit C Accumulation in Cerebellar Cells
Source: PLoS One. 2011 Feb 17;6(2):e17118. doi: 10.1371/journal.pone.0017118 (PMC3040763; doi:10.1371/journal.pone.0017118)
Supplement: Table S6 — Significantly altered gene sets identified by sigPathway analysis of the Cb Cln3 Δex7/8 dataset. The significantly altered (q-value<0.01) gene sets, and associated statistics details, are shown for the CbCln3 Δex7/8 cells. For comparison, the statistics for these same gene sets are shown for the CbCln6 nclf cells. For a complete description of the NTk and NEk value determinations, see Materials and Methods. (XLS) [file pone.0017118.s010.xls]

## Sheet: Sheet1
Table S6. Significantly altered gene sets identified by sigPathway analysis of the CbCln3∆ex7/8 dataset
				CbCln3∆ex7/8 cells								CbCln6nclf cells
IndexG	Gene Set Category	Pathway	Set Size	NTk Stat	NTk q-value	NTk Rank	NEk Stat	NEk q-value	NEk Rank	Mean Rank	Mean Stat	NTk Stat	NTk q-value	NTk Rank	NEk Stat	NEk q-value	NEk Rank	Mean Rank	Mean Stat
40	GO:0005740	mitochondrial membrane	301	6.30333	0	31.6667	2.57	0	305	168.333	4.43667	-8.69667	0	26.3333	0.8	0.0229084	1825	925.667	-3.94833
45	GO:0005743	mitochondrial inner membrane	236	5.91333	0	35.6667	2.71	0	249	142.333	4.31167	-7.43667	0	42	1.62	0.00590046	1753.5	897.75	-2.90833
247	GO:0005840	ribosome	381	6.85	0	26.3333	2.01	0	545	285.667	4.43	-10.2833	0	16	-0.34	0.0393066	1856	936	-5.31167
596	GO:0016070	RNA metabolism	793	-7.14667	0	22.6667	-2.73	0	237	129.833	-4.93833	-5.21667	0	109.667	3.18	0	1264	686.833	-1.01833
1365	GO:0045184	establishment of protein localization	1396	4.49333	0	54.6667	-1	0.180021	1275	664.833	1.74667	-10.99	0	9.33333	3.69	0	437	223.167	-3.65
1668	GO:0016491	oxidoreductase activity	1141	7.84	0	18	1.62	0.0785329	951.5	484.75	4.73	-6.82667	0	52	3.89	0	143	97.5	-1.46833
1737	GO:0008104	protein localization	1446	4.6	0	51.3333	-1	0.180021	1275	663.167	1.8	-10.84	0	11	3.7	0	425	218	-3.57
1752	GO:0015077	monovalent inorganic cation transporter activity	279	10.97	0	3.33333	2.7	0	252	127.667	6.835	-8.81333	0	24.3333	-1.25	0.0116279	1788.5	906.417	-5.03167
1754	GO:0015078	hydrogen ion transporter activity	266	11.3867	0	2	2.82	0	204	103	7.10333	-8.94667	0	23	-1.66	0	1721	872	-5.30333
1791	GO:0031090	organelle membrane	742	6	0	34	1.25	0.12974	1118	576	3.625	-10.8667	0	11	3.67	0	476	243.5	-3.59833
1830	GO:0015031	protein transport	1357	4.51667	0	53	-1	0.180021	1275	664	1.75833	-11.13	0	7.33333	3.69	0	444	225.667	-3.72
2684	GO:0015399	primary active transporter activity	352	10.0767	0	9	2.37	0	389	199	6.22333	-8.22667	0	32	2.12	0	1678	855	-3.05333
2950	GO:0019866	inner membrane	291	6.44667	0	30	2.6	0	289	159.5	4.52333	-7.91667	0	35.3333	1.74	0	1718	876.667	-3.08833
4268	GO:0051243	negative regulation of cellular physiological process	996	4.35667	0	56.3333	0.34	0.321109	1713.5	884.917	2.34833	-5.54	0	94.6667	3.68	0	460	277.333	-0.93
4859	GO:0005386	carrier activity	785	6.99	0	25.3333	1.62	0.0785329	951.5	488.417	4.305	-5.00333	0	116.667	4.24	0	6	61.3333	-0.381667
5124	GO:0003735	structural constituent of ribosome	440	7.04	0	24	1.91	0	570	297	4.475	-10.1767	0	17.6667	0.48	0.0338733	1845	931.333	-4.84833
5226	GO:0043067	regulation of programmed cell death	537	4.74333	0	50	1.62	0.0785329	951.5	500.75	3.18167	-5.77333	0	85.3333	3.89	0	161	123.167	-0.941667
5743	GO:0005794	Golgi apparatus	997	5.34333	0	40.3333	0.07	0.378069	1871.5	955.917	2.70667	-8.74667	0	25.3333	3.85	0	201	113.167	-2.44833
5745	GO:0005795	Golgi stack	771	5.58333	0	38	0.63	0.252459	1550.5	794.25	3.10667	-8.56667	0	29	3.88	0	168	98.5	-2.34333
5798	GO:0005783	endoplasmic reticulum	1077	5.04	0	46.6667	-0.07	0.385304	1831.5	939.083	2.485	-12.1133	0	3	3.72	0	393	198	-4.19667
6118	KEGG	Oxidative_phosphorylation	245	12.3367	0	1	3.11	0	126	63.5	7.72333	-10.1867	0	17.3333	-2.55	0	1593	805.167	-6.36833
6213	KEGG	Ribosome	215	8.93	0	12	3.16	0	114	63	6.045	-8.67	0	27	-1	0.0173891	1803.5	915.25	-4.835
259	GO:0005830	cytosolic ribosome (sensu Eukaryota)	125	6.66667	0	28	3.26	0	97	62.5	4.96333	-5.99667	0.000238604	86.1667	-1.96	0	1697	891.583	-3.97833
1032	GO:0046873	metal ion transporter activity	163	8.69	0	14	3.66	0	32	23	6.175	-5.97	0.000238604	86.5	-0.63	0.0285501	1830.5	958.5	-3.3
2372	GO:0006091	generation of precursor metabolites and energy	839	5.32667	0	41	0.48	0.289867	1608	824.5	2.90333	-3.96667	0.000485841	155.167	3.84	0	213	184.083	-0.0633333
5814	GO:0005773	vacuole	257	8.04667	0	16	2.75	0	232	124	5.39833	-3.66	0.000912999	172.167	3.95	0	87	129.583	0.145
2491	GO:0006082	organic acid metabolism	730	4.54333	0	52.6667	1.62	0.0785329	951.5	502.083	3.08167	-3.66	0.000923113	170.333	3.81	0	262	216.167	0.075
2589	GO:0019752	carboxylic acid metabolism	730	4.54333	0	52.6667	1.62	0.0785329	951.5	502.083	3.08167	-3.66	0.000923113	170.333	3.81	0	262	216.167	0.075
4448	GO:0006119	oxidative phosphorylation	91	8.80333	0	13	3.4	0	79	46	6.10167	-3.56333	0.00126872	182	-2.76	0	1516	849	-3.16167
3915	GO:0016655	oxidoreductase activity, acting on NADH or NADPH, quinone or similar compound as acceptor	85	10.5633	0	7	3.68	0	28	17.5	7.12167	-4.66333	0.00136669	149.167	-2.71	0	1533	841.083	-3.68667
512	GO:0003954	NADH dehydrogenase activity	80	10.8733	0	5.33333	3.65	0	35	20.1667	7.26167	-3.47333	0.00175673	192.667	-2.78	0	1507	849.833	-3.12667
1305	GO:0050136	NADH dehydrogenase (quinone) activity	80	10.8733	0	5.33333	3.65	0	35	20.1667	7.26167	-3.47333	0.00175673	192.667	-2.78	0	1507	849.833	-3.12667
1679	GO:0008137	NADH dehydrogenase (ubiquinone) activity	80	10.8733	0	5.33333	3.65	0	35	20.1667	7.26167	-3.47333	0.00175673	192.667	-2.78	0	1507	849.833	-3.12667
1720	GO:0015081	sodium ion transporter activity	80	10.8733	0	5.33333	3.65	0	35	20.1667	7.26167	-3.47333	0.00175673	192.667	-2.78	0	1507	849.833	-3.12667
1751	GO:0015075	ion transporter activity	1252	5.22667	0	43.3333	1.62	0.0785329	951.5	497.417	3.42333	3.41333	0.0020676	191.333	3.89	0	155	173.167	3.65167
761	GO:0043235	receptor complex	117	-5.02	0	47	-3	0	149	98	-4.01	3.40333	0.00212938	197	3.86	0	189	193	3.63167
1677	GO:0008135	translation factor activity, nucleic acid binding	250	-4.06333	0	59	-2.51	0	333	196	-3.28667	-3.35	0.00230216	205.167	3.21	0	1224	714.583	-0.07
4139	GO:0000323	lytic vacuole	234	7.87667	0	17.6667	2.87	0	183	100.333	5.37333	-3.26	0.00296605	220.833	3.9	0	138	179.417	0.32
5769	GO:0005764	lysosome	234	7.87667	0	17.6667	2.87	0	183	100.333	5.37333	-3.26	0.00296605	220.833	3.9	0	138	179.417	0.32
2326	GO:0042773	ATP synthesis coupled electron transport	30	8.39	0	15	4.15	0	4	9.5	6.27	-3.21667	0.00328883	246.167	-2.32	0	1651	948.583	-2.76833
3564	GO:0006396	RNA processing	668	-6.31	0	32	-2.67	0	267	149.5	-4.49	-3.19	0.00349913	239.833	3.18	0	1266	752.917	-0.005
6199	KEGG	Porphyrin_and_chlorophyll_metabolism	42	10.8333	0	5.33333	4.34	0	1	3.16667	7.58667	-3.13333	0.0039403	271.5	-2.42	0	1626	948.75	-2.77667
4447	GO:0006118	electron transport	531	5.29	0	42.3333	1.62	0.0785329	951.5	496.917	3.455	-3.01	0.00484669	322.333	3.96	0	83	202.667	0.475
6111	KEGG	Fatty_acid_metabolism	75	10.9433	0	4	3.68	0	27	15.5	7.31167	-2.94333	0.00524945	354.167	0.34	0.0391918	1864.5	1109.33	-1.30167
601	GO:0016072	rRNA metabolism	70	-5.44	0	39	-3.26	0	98	68.5	-4.35	-2.86333	0.00616199	397.333	1.78	0	1711	1054.17	-0.541667
3623	GO:0006364	rRNA processing	70	-5.44	0	39	-3.26	0	98	68.5	-4.35	-2.86333	0.00616199	397.333	1.78	0	1711	1054.17	-0.541667
6128	KEGG	Valine,_leucine_and_isoleucine_degradation	99	10.1267	0	8	3.71	0	25	16.5	6.91833	-2.81667	0.00666219	427.833	2.6	0	1567	997.417	-0.108333
6122	KEGG	Pyrimidine_metabolism	179	-5.75667	0	37	-3.63	0	38	37.5	-4.69333	-2.69333	0.00852414	491.5	3.08	0	1345	918.25	0.193333
6184	KEGG	Butanoate_metabolism	103	6.63667	0	28.6667	3.66	0	31	29.8333	5.14833	-2.44	0.0141041	624.333	3.02	0	1384	1004.17	0.29
3882	GO:0016667	oxidoreductase activity, acting on sulfur group of donors	38	-9.66	0	10.3333	-4.17	0	3	6.66667	-6.915	-1.88	0.0401494	892.167	3.11	0	1320	1106.08	0.615
5523	GO:0006691	leukotriene metabolism	25	-7.47	0	21.3333	-3.61	0	40	30.6667	-5.54	1.35333	0.0910091	1157.33	3.7	0	424	790.667	2.52667
1128	GO:0019370	leukotriene biosynthesis	22	-7.82333	0	18.3333	-3.4	0	78	48.1667	-5.61167	1.20333	0.112499	1220.33	3.71	0	415	817.667	2.45667
1835	GO:0015036	disulfide oxidoreductase activity	33	-9.62667	0	10.6667	-4.14	0	6	8.33333	-6.88333	-1.13	0.122591	1268	2.44	0	1621	1444.5	0.655
884	GO:0008324	cation transporter activity	980	6.27	0	32.3333	1.62	0.0785329	951.5	491.917	3.945	0.66	0.199435	1533.33	3.92	0	118	825.667	2.29
483	GO:0005506	iron ion binding	419	5.13667	0	45	2.21	0	478	261.5	3.67333	0.08	0.302967	1849.67	4.14	0	19	934.333	2.11
2071	GO:0045764	positive regulation of amino acid metabolism	30	-5.96333	0.000623352	42.5	-2.78	0	215	128.75	-4.37167	3.27333	0.00289334	217.833	3.54	0	709	463.417	3.40667
3254	GO:0001934	positive regulation of protein amino acid phosphorylation	30	-5.96333	0.000623352	42.5	-2.78	0	215	128.75	-4.37167	3.27333	0.00289334	217.833	3.54	0	709	463.417	3.40667
944	GO:0042327	positive regulation of phosphorylation	28	-6.25667	0.000623352	39.8333	-2.48	0	349	194.417	-4.36833	3.12333	0.00396016	267.167	3.55	0	701	484.083	3.33667
2057	GO:0050731	positive regulation of peptidyl-tyrosine phosphorylation	28	-6.25667	0.000623352	39.8333	-2.48	0	349	194.417	-4.36833	3.12333	0.00396016	267.167	3.55	0	701	484.083	3.33667
4445	GO:0045937	positive regulation of phosphate metabolism	28	-6.25667	0.000623352	39.8333	-2.48	0	349	194.417	-4.36833	3.12333	0.00396016	267.167	3.55	0	701	484.083	3.33667
2997	GO:0050662	coenzyme binding	79	-4.64667	0.000623352	55.8333	-3.83	0	17	36.4167	-4.23833	-2.92333	0.00569621	363.167	1.62	0.00590046	1753.5	1058.33	-0.651667
1125	GO:0007017	microtubule-based process	322	-3.85333	0.000623352	66.5	-2.34	0	408	237.25	-3.09667	-2.14333	0.0250176	766.5	3.45	0	879	822.75	0.653333
3121	GO:0019814	immunoglobulin complex	23	-6.42333	0.000636574	39.1667	-3.66	0	33	36.0833	-5.04167	3.14	0.00389141	257.833	3.69	0	443	350.417	3.415
6287	mousepaths	Nitric Oxide	209	-4.44	0.000636574	58.1667	-3.19	0	108	83.0833	-3.815	-2.76333	0.00725349	463.667	3.56	0	680	571.833	0.398333
826	GO:0008380	RNA splicing	369	-4.14667	0.000636574	63.5	-2.58	0	302	182.75	-3.36333	-2.35333	0.016826	665	3.09	0	1335	1000	0.368333
4508	GO:0042981	regulation of apoptosis	532	4.43667	0.000929632	53.3333	1.62	0.0785329	951.5	502.417	3.02833	-5.90333	0	78.6667	3.87	0	178	128.333	-1.01667
5443	GO:0048523	negative regulation of cellular process	1173	3.96333	0.000929632	60.3333	-0.07	0.385304	1831.5	945.917	1.94667	-5.24667	0	109	3.78	0	301	205	-0.733333
3569	GO:0006399	tRNA metabolism	138	-4.06667	0.00125993	68.3333	-2.96	0	162	115.167	-3.51333	-3.04667	0.00452896	302.5	2.28	0	1656	979.25	-0.383333
1798	GO:0042101	T cell receptor complex	22	-4.97	0.00125993	59.6667	-3.14	0	119	89.3333	-4.055	2.76	0.00743289	459	3.62	0	567	513	3.19
1129	GO:0007018	microtubule-based movement	166	-3.98333	0.00125993	69.6667	-2.77	0	222	145.833	-3.37667	-1.60333	0.0623493	1041	3.44	0	896	968.5	0.918333
3159	GO:0042579	microbody	124	5.12	0.0014287	49.5	3.05	0	138	93.75	4.085	-2.80333	0.00696597	432.5	4.04	0	45	238.75	0.618333
5822	GO:0005777	peroxisome	124	5.12	0.0014287	49.5	3.05	0	138	93.75	4.085	-2.80333	0.00696597	432.5	4.04	0	45	238.75	0.618333
2652	GO:0019722	calcium-mediated signaling	29	-4.7	0.00143125	58.5	-4.08	0	8	33.25	-4.39	2.07	0.0290485	800.167	3.67	0	478	639.083	2.87
2073	GO:0030705	cytoskeleton-dependent intracellular transport	170	-3.97333	0.00143125	67.1667	-2.76	0	230	148.583	-3.36667	-1.64667	0.058051	1017.17	3.47	0	843	930.083	0.911667
5068	GO:0003723	RNA binding	1133	-3.81333	0.00144447	69.5	-2.19	0	485	277.25	-3.00167	-7.62667	0	38.6667	3.34	0	1069	553.833	-2.14333
5521	GO:0006690	icosanoid metabolism	41	-4.46667	0.00144447	60.5	-3.4	0	76	68.25	-3.93333	1.98667	0.033474	842.333	3.77	0	326	584.167	2.87833
167	GO:0046456	icosanoid biosynthesis	32	-4.75	0.00144447	57.5	-2.97	0	159	108.25	-3.86	1.27333	0.10289	1190.83	3.77	0	320	755.417	2.52167
5680	GO:0006629	lipid metabolism	956	3.88667	0.00150107	64	0.34	0.321109	1713.5	888.75	2.11333	-6.8	0	54	3.89	0	158	106	-1.455
5474	GO:0048519	negative regulation of biological process	1270	3.79667	0.00168545	63.3333	-0.34	0.32836	1669.5	866.417	1.72833	-5.26333	0	108.333	3.79	0	292	200.167	-0.736667
1363	GO:0045182	translation regulator activity	259	-3.73	0.00195016	75.1667	-2.48	0	348	211.583	-3.105	-3.34	0.0024123	208.5	3.25	0	1189	698.75	-0.045
550	GO:0043118	negative regulation of physiological process	1024	3.69333	0.00218451	69.1667	-0.34	0.32836	1669.5	869.333	1.67667	-5.63	0	89.3333	3.67	0	480	284.667	-0.98
3947	GO:0000398	nuclear mRNA splicing, via spliceosome	349	-3.69667	0.00236157	77.5	-2.51	0	334	205.75	-3.10333	-2.40333	0.0152056	641.667	3.05	0	1366	1003.83	0.323333
4114	GO:0000375	RNA splicing, via transesterification reactions	349	-3.69667	0.00236157	77.5	-2.51	0	334	205.75	-3.10333	-2.40333	0.0152056	641.667	3.05	0	1366	1003.83	0.323333
4120	GO:0000377	RNA splicing, via transesterification reactions with bulged adenosine as nucleophile	349	-3.69667	0.00236157	77.5	-2.51	0	334	205.75	-3.10333	-2.40333	0.0152056	641.667	3.05	0	1366	1003.83	0.323333
1089	GO:0030183	B cell differentiation	49	-4.15	0.0024227	74.1667	-3.11	0	125	99.5833	-3.63	0.396667	0.248772	1672.67	3.33	0	1079	1375.83	1.86333
2702	GO:0045597	positive regulation of cell differentiation	97	-3.66	0.00254036	81.6667	-3.31	0	93	87.3333	-3.485	-2.53	0.01168	579	3.38	0	992	785.5	0.425
5186	GO:0006818	hydrogen transport	126	4.08667	0.00255749	70.3333	1.71	0	612	341.167	2.89833	-2.86	0.00606795	406.333	2.5	0	1609	1007.67	-0.18
5304	GO:0043037	translation	303	-3.66	0.00260726	78.6667	-2.7	0	253	165.833	-3.18	-6.54667	0	61.3333	2.99	0	1408	734.667	-1.77833
6247	KEGG	Adipocytokine_signaling_pathway	157	3.89333	0.00263882	72.8333	1.9	0	574	323.417	2.89667	-2.71333	0.00824208	480.167	3.39	0	984	732.083	0.338333
1890	GO:0008284	positive regulation of cell proliferation	174	-3.67333	0.0027162	88	-2.94	0	167	127.5	-3.30667	0.233333	0.275141	1776	3.72	0	386	1081	1.97667
4304	GO:0051239	regulation of organismal physiological process	271	-3.62333	0.00297076	86.8333	-2.36	0	391	238.917	-2.99167	0.1	0.299709	1839.67	3.8	0	269	1054.33	1.95
5208	GO:0003899	DNA-directed RNA polymerase activity	71	-3.62333	0.00298492	82.6667	-3.05	0	136	109.333	-3.33667	-2.77333	0.00714726	456	2.48	0	1614	1035	-0.146667
2240	GO:0050851	antigen receptor-mediated signaling pathway	34	-3.6	0.00304605	86.6667	-3.78	0	21	53.8333	-3.69	1.37333	0.0887355	1151.33	0.63	0.0284231	1836	1493.67	1.00167
1675	GO:0008134	transcription factor binding	340	3.72667	0.00311066	77.6667	1.25	0.12974	1118	597.833	2.48833	-2.44667	0.013952	616.333	3.89	0	152	384.167	0.721667
5583	GO:0009607	response to biotic stimulus	1178	3.6	0.00339463	77.8333	0.8	0.215565	1424	750.917	2.2	2.54333	0.0114118	568.667	3.84	0	221	394.833	3.19167
3082	GO:0031326	regulation of cellular biosynthesis	203	-3.54	0.00358549	90.3333	-2.55	0	315	202.667	-3.045	-1.86667	0.0412045	901.333	3.45	0	882	891.667	0.791667
1954	GO:0016407	acetyltransferase activity	109	3.56333	0.00377922	80.5	3.46	0	65	72.75	3.51167	-1.92	0.0376584	874.667	3.38	0	1004	939.333	0.73
1812	GO:0019199	transmembrane receptor protein kinase activity	172	3.56333	0.00377922	80.5	2.22	0	470	275.25	2.89167	-1.01667	0.139081	1334.83	3.79	0	289	811.917	1.38667
5831	BioCarta	Ras-Independent pathway in NK cell-mediated cytotoxicity	41	-3.53667	0.00379534	95.3333	-3.34	0	87	91.1667	-3.43833	-0.936667	0.15064	1388.17	3.34	0	1055	1221.58	1.20167
5020	GO:0009889	regulation of biosynthesis	208	-3.50333	0.00390955	95.6667	-2.57	0	307	201.333	-3.03667	-2.06667	0.0290139	802.667	3.43	0	908	855.333	0.681667
5081	GO:0003712	transcription cofactor activity	302	3.52667	0.00423945	87.5	1.62	0.0785329	951.5	519.5	2.57333	-1.67	0.0558637	1004.5	3.96	0	80	542.25	1.145
4598	GO:0009205	purine ribonucleoside triphosphate metabolism	91	3.51667	0.00424468	89.6667	1.62	0.0785329	951.5	520.583	2.56833	-3.50333	0.00149063	187	-3.27	0	1164	675.5	-3.38667
4054	GO:0006417	regulation of protein biosynthesis	199	-3.47667	0.00430922	96.6667	-2.59	0	292	194.333	-3.03333	-2.00333	0.0324911	834	3.44	0	893	863.5	0.718333
4005	GO:0009199	ribonucleoside triphosphate metabolism	95	3.5	0.00445135	92	1.93	0	564	328	2.715	-3.46667	0.00164872	191.333	-3.27	0	1169	680.167	-3.36833
2330	GO:0042775	ATP synthesis coupled electron transport (sensu Eukaryota)	25	3.5	0.00445481	91.5	4.15	0	5	48.25	3.825	-3.15	0.0037922	264	-1	0.0173891	1803.5	1033.75	-2.075
2882	GO:0007169	transmembrane receptor protein tyrosine kinase signaling pathway	238	3.54667	0.00450753	107.333	1.62	0.0785329	951.5	529.417	2.58333	-2.70333	0.00825002	491.333	3.47	0	844	667.667	0.383333
2796	GO:0045580	regulation of T cell differentiation	29	-3.44	0.00463327	102	-3	0	150	126	-3.22	-1.27333	0.102742	1188.5	3.95	0	94	641.25	1.33833
5728	GO:0015992	proton transport	100	3.48	0.0046588	96.6667	2.05	0	536	316.333	2.765	-2.99667	0.0049059	322.167	0.2	0.0445521	1873	1097.58	-1.39833
1037	GO:0046879	hormone secretion	26	-3.44	0.00477281	108	-2.68	0	259	183.5	-3.06	1.8	0.0459626	933.833	3.56	0	676	804.917	2.68
774	GO:0017157	regulation of exocytosis	27	-3.42	0.00486013	106.667	-3.92	0	13	59.8333	-3.67	1.90333	0.0387324	884.667	3.56	0	685	784.833	2.73167
4231	GO:0009145	purine nucleoside triphosphate biosynthesis	85	3.45333	0.00492026	100.667	1.62	0.0785329	951.5	526.083	2.53667	-3.40333	0.00207007	201.5	-3.02	0	1381	791.25	-3.21167
4590	GO:0009201	ribonucleoside triphosphate biosynthesis	85	3.45333	0.00492026	100.667	1.62	0.0785329	951.5	526.083	2.53667	-3.40333	0.00207007	201.5	-3.02	0	1381	791.25	-3.21167
4601	GO:0009206	purine ribonucleoside triphosphate biosynthesis	85	3.45333	0.00492026	100.667	1.62	0.0785329	951.5	526.083	2.53667	-3.40333	0.00207007	201.5	-3.02	0	1381	791.25	-3.21167
33	GO:0030054	cell junction	389	-3.42	0.00493421	108.167	-1.62	0.0884888	755	431.583	-2.52	1.12667	0.122715	1268.17	3.69	0	441	854.583	2.40833
3014	GO:0019882	antigen presentation	73	3.45333	0.00505144	100.333	3.98	0	11	55.6667	3.71667	0.61	0.208511	1557.17	3.44	0	894	1225.58	2.025
2803	GO:0045582	positive regulation of T cell differentiation	25	-3.40333	0.00506367	107.167	-3.56	0	49	78.0833	-3.48167	-1.83	0.0439511	920.167	3.92	0	116	518.083	1.045
281	GO:0009967	positive regulation of signal transduction	51	-3.42	0.00510773	115.5	-3.79	0	20	67.75	-3.605	0.593333	0.211461	1564.67	3.43	0	901	1232.83	2.01167
6119	KEGG	ATP_synthesis	82	3.42	0.00512366	103.667	1.93	0	565	334.333	2.675	-3.08667	0.00433824	275.167	-2.36	0	1643	959.083	-2.72333
35	GO:0030055	cell-matrix junction	75	-3.40333	0.00513288	109	-3	0	152	130.5	-3.20167	-2.91	0.00555636	373.167	2.89	0	1467	920.083	-0.01
5177	GO:0046034	ATP metabolism	78	3.40333	0.00517127	109.667	1.89	0	583	346.333	2.64667	-3.13667	0.00396739	259.167	-2.59	0	1571	915.083	-2.86333
5706	GO:0006631	fatty acid metabolism	262	3.42	0.00523221	98	1.62	0.0785329	951.5	524.75	2.52	-3.07	0.00437971	281.833	3.29	0	1130	705.917	0.11
4230	GO:0009144	purine nucleoside triphosphate metabolism	94	3.39333	0.00538513	107.667	1.62	0.0785329	951.5	529.583	2.50667	-3.46667	0.00164872	191.333	-3.26	0	1178	684.667	-3.36333
2692	GO:0048037	cofactor binding	97	-3.37333	0.00538879	115.333	-3.66	0	30	72.6667	-3.51667	-2.84667	0.00637002	410.833	2.73	0	1528	969.417	-0.0583333
385	GO:0006955	immune response	821	3.40333	0.0053943	100.333	1.25	0.12974	1118	609.167	2.32667	4.33333	0	137	3.84	0	217	177	4.08667
778	GO:0046777	autophosphorylation	57	-3.36667	0.00550827	116	-3.73	0	22	69	-3.54833	0.02	0.312536	1879.33	3.37	0	1017	1448.17	1.695
3710	GO:0016540	protein autoprocessing	57	-3.36667	0.00550827	116	-3.73	0	22	69	-3.54833	0.02	0.312536	1879.33	3.37	0	1017	1448.17	1.695
214	GO:0005829	cytosol	630	3.41	0.00555189	111.5	-0.07	0.385304	1831.5	971.5	1.67	-9.37	0	21	3.42	0	930	475.5	-2.975
5808	GO:0005770	late endosome	51	3.37667	0.00557552	109.5	3.57	0	45	77.25	3.47333	-2.42333	0.0145958	625.667	1.62	0.00590046	1753.5	1189.58	-0.401667
4075	GO:0006446	regulation of translational initiation	53	-3.35667	0.00557567	116.667	-2.35	0	401	258.833	-2.85333	0.0466667	0.308772	1870.33	3.39	0	985	1427.67	1.71833
6273	mousepaths	Tumor Metastasis	220	-3.33667	0.00576829	127	-1.62	0.0884888	755	441	-2.47833	-2.90333	0.00560074	376.333	3.48	0	830	603.167	0.288333
1925	GO:0051050	positive regulation of transport	67	-3.34	0.00588136	118	-3.05	0	139	128.5	-3.195	1.46	0.0773012	1115	3.86	0	182	648.5	2.66
6011	BioCarta	IL22 Soluble Receptor Signaling Pathway	20	3.35667	0.00590089	110	3.06	0	134	122	3.20833	-2.14333	0.025085	765.833	1.62	0.00590046	1753.5	1259.67	-0.261667
5753	GO:0044255	cellular lipid metabolism	806	3.33	0.00604937	126	0.2	0.35093	1770.5	948.25	1.765	-6.54	0	62	3.9	0	131	96.5	-1.32
3025	GO:0019885	antigen processing, endogenous antigen via MHC class I	28	3.33667	0.00607064	113.667	3.53	0	54	83.8333	3.43333	-0.63	0.205192	1549	2.38	0	1635	1592	0.875
1162	GO:0019320	hexose catabolism	97	-3.31333	0.00613867	123.5	-2.57	0	310	216.75	-2.94167	0.0233333	0.312572	1880.17	3.46	0	852	1366.08	1.74167
2694	GO:0006007	glucose catabolism	97	-3.31333	0.00613867	123.5	-2.57	0	310	216.75	-2.94167	0.0233333	0.312572	1880.17	3.46	0	852	1366.08	1.74167
5776	GO:0046365	monosaccharide catabolism	97	-3.31333	0.00613867	123.5	-2.57	0	310	216.75	-2.94167	0.0233333	0.312572	1880.17	3.46	0	852	1366.08	1.74167
362	GO:0046164	alcohol catabolism	101	-3.30333	0.0062993	128.333	-2.51	0	331	229.667	-2.90667	0.19	0.282248	1801.17	3.46	0	861	1331.08	1.825
3562	GO:0042612	MHC class I protein complex	23	3.31	0.00637325	118.167	3.8	0	19	68.5833	3.555	-0.86	0.163177	1437.67	1.62	0.00590046	1753.5	1595.58	0.38
1321	GO:0030106	MHC class I receptor activity	29	3.31	0.00641092	119.167	3.56	0	48	83.5833	3.435	-0.43	0.241779	1654.67	2.45	0	1620	1637.33	1.01
3017	GO:0019883	antigen presentation, endogenous antigen	30	3.29	0.00657724	123.333	3.46	0	64	93.6667	3.375	0.3	0.264397	1733.5	2.76	0	1518	1625.75	1.53
2737	GO:0004467	long-chain-fatty-acid-CoA ligase activity	20	3.27667	0.00661097	135.167	3.71	0	24	79.5833	3.49333	-2.65667	0.00914397	513.167	-1.64	0.00609756	1723	1118.08	-2.14833
1957	GO:0016408	C-acyltransferase activity	24	3.27	0.00665018	136.333	3.95	0	12	74.1667	3.61	-0.93	0.151731	1394	3.1	0	1331	1362.5	1.085
5084	GO:0003714	transcription corepressor activity	124	3.26	0.006667	135.667	2.64	0	276	205.833	2.95	-1.08333	0.129475	1294.33	3.59	0	609	951.667	1.25333
6110	KEGG	Fatty_acid_elongation_in_mitochondria	21	3.26667	0.00668213	133.667	3.47	0	62	97.8333	3.36833	-1.25333	0.105428	1197.17	2.28	0	1655	1426.08	0.513333
2863	GO:0016779	nucleotidyltransferase activity	204	-3.27667	0.00668715	129.333	-2.83	0	203	166.167	-3.05333	-3.01667	0.00477615	310.833	3.05	0	1364	837.417	0.0166667
1608	GO:0030217	T cell differentiation	57	-3.25333	0.00669441	141.833	-2.65	0	272	206.917	-2.95167	0.763333	0.180529	1478	3.66	0	486	982	2.21167
1116	GO:0007010	cytoskeleton organization and biogenesis	859	-3.29	0.00672605	127.5	-1.62	0.0884888	755	441.25	-2.455	-2.61333	0.00987714	532.833	3.53	0	749	640.917	0.458333
3560	GO:0042611	MHC protein complex	28	3.25667	0.00673887	137.167	3.51	0	57	97.0833	3.38333	-0.24	0.274516	1773	1.62	0.00590046	1753.5	1763.25	0.69
187	GO:0046483	heterocycle metabolism	100	-3.26	0.0067743	134.833	-2.42	0	373	253.917	-2.84	0.266667	0.269398	1755	3.44	0	884	1319.5	1.85333
564	GO:0016055	Wnt receptor signaling pathway	220	3.25	0.0067927	142	1.62	0.0785329	951.5	546.75	2.435	-2.63333	0.00947919	522.667	3.68	0	469	495.833	0.523333
3340	GO:0045621	positive regulation of lymphocyte differentiation	32	-3.27667	0.00682484	130.333	-2.5	0	335	232.667	-2.88833	-1.87	0.0407323	898.5	3.68	0	471	684.75	0.905
2781	GO:0016765	transferase activity, transferring alkyl or aryl (other than methyl) groups	100	3.26667	0.006828	133.167	3.5	0	60	96.5833	3.38333	-1.98	0.0337934	847.5	3.19	0	1247	1047.25	0.605
58	GO:0005730	nucleolus	185	-3.24667	0.00691946	140.833	-2.48	0	347	243.917	-2.86333	-2.78	0.00714047	450.833	2.84	0	1488	969.417	0.03
5159	GO:0006825	copper ion transport	27	3.23	0.00695901	146.167	3.19	0	107	126.583	3.21	-2.62333	0.00973787	529	0.8	0.0229084	1825	1177	-0.911667
700	GO:0030316	osteoclast differentiation	25	-3.26	0.0069691	138.667	-4.22	0	2	70.3333	-3.74	-1.46333	0.0770751	1108.67	3.11	0	1317	1212.83	0.823333
1800	GO:0042102	positive regulation of T cell proliferation	34	-3.23667	0.00700448	143.5	-3.81	0	18	80.75	-3.52333	1.10667	0.125751	1282.33	3.5	0	780	1031.17	2.30333
2377	GO:0006096	glycolysis	83	-3.24	0.00704496	138.833	-2.45	0	360	249.417	-2.845	0.436667	0.240206	1651	3.42	0	940	1295.5	1.92833
4279	GO:0030900	forebrain development	98	3.21333	0.00704775	152.667	2.85	0	192	172.333	3.03167	-2.11667	0.0261975	780.833	3.35	0	1038	909.417	0.616667
4875	GO:0005375	copper ion transporter activity	24	3.23333	0.00707758	144.167	3.23	0	103	123.583	3.23167	-2.46667	0.0134079	610	1.62	0.00590046	1753.5	1181.75	-0.423333
3382	GO:0045619	regulation of lymphocyte differentiation	39	-3.25	0.00714545	138.333	-1.62	0.0884888	755	446.667	-2.435	-1.07667	0.13021	1297.83	3.71	0	414	855.917	1.31667
5115	GO:0015629	actin cytoskeleton	458	-3.23667	0.00725774	145.833	-1.62	0.0884888	755	450.417	-2.42833	-3.05	0.00461209	295.833	3.6	0	600	447.917	0.275
6208	KEGG	Alkaloid_biosynthesis_II	41	3.22333	0.0073129	142.5	2.79	0	213	177.75	3.00667	-0.586667	0.213094	1569	3.43	0	915	1242	1.42167
3451	GO:0015405	P-P-bond-hydrolysis-driven transporter activity	215	3.19667	0.00732046	155.333	0.63	0.252459	1550.5	852.917	1.91333	-2.91	0.00561849	375.333	4.07	0	32	203.667	0.58
380	GO:0006952	defense response	974	3.2	0.0073892	154.333	1	0.1745	1347.5	750.917	2.1	5.42	0	100.333	3.84	0	223	161.667	4.63
1746	GO:0016469	proton-transporting two-sector ATPase complex	60	3.21667	0.00743865	142.833	1.96	0	558	350.417	2.58833	-3.02667	0.00469598	305.5	-2.66	0	1547	926.25	-2.84333
5786	GO:0015985	energy coupled proton transport, down electrochemical gradient	60	3.21667	0.00743865	142.833	1.96	0	558	350.417	2.58833	-3.02667	0.00469598	305.5	-2.66	0	1547	926.25	-2.84333
5788	GO:0015986	ATP synthesis coupled proton transport	60	3.21667	0.00743865	142.833	1.96	0	558	350.417	2.58833	-3.02667	0.00469598	305.5	-2.66	0	1547	926.25	-2.84333
6121	KEGG	Purine_metabolism	293	-3.20667	0.00744456	145.833	-2.72	0	241	193.417	-2.96333	-2.27	0.0195526	708.167	3.25	0	1196	952.083	0.49
599	GO:0016071	mRNA metabolism	520	-3.2	0.00745881	154	-2.28	0	443	298.5	-2.74	-2.30667	0.0182821	690.667	3.27	0	1167	928.833	0.481667
4880	GO:0006753	nucleoside phosphate metabolism	72	3.2	0.00751154	150.167	1.62	0.0785329	951.5	550.833	2.41	-3.07333	0.00441719	282.667	-2.51	0	1605	943.833	-2.79167
4882	GO:0006754	ATP biosynthesis	72	3.2	0.00751154	150.167	1.62	0.0785329	951.5	550.833	2.41	-3.07333	0.00441719	282.667	-2.51	0	1605	943.833	-2.79167
5138	GO:0015645	fatty-acid ligase activity	23	3.18333	0.00755668	158.333	3.65	0	34	96.1667	3.41667	-1.91667	0.037738	875	2.19	0	1669	1272	0.136667
2055	GO:0050730	regulation of peptidyl-tyrosine phosphorylation	62	-3.20667	0.00755733	145	-2.47	0	351	248	-2.83833	2.28333	0.0191094	699.667	3.98	0	76	387.833	3.13167
2878	GO:0007167	enzyme linked receptor protein signaling pathway	467	3.18667	0.00770284	159.833	0.63	0.252459	1550.5	855.167	1.90833	-2.89333	0.00575584	386.5	3.62	0	572	479.25	0.363333
3734	GO:0051168	nuclear export	85	-3.17333	0.00791137	157.5	-2.67	0	263	210.25	-2.92167	-0.463333	0.235728	1634.33	3.46	0	859	1246.67	1.49833
2426	GO:0019208	phosphatase regulator activity	79	-3.2	0.00798191	146.5	-2.75	0	235	190.75	-2.975	0.773333	0.178827	1472.5	3.28	0	1156	1314.25	2.02667
3374	GO:0007269	neurotransmitter secretion	79	-3.18	0.00800093	156.167	-1.62	0.0884888	755	455.583	-2.4	3.72333	0.000513852	152.5	3.48	0	829	490.75	3.60167
6181	KEGG	Propanoate_metabolism	56	3.17667	0.00808681	153.333	3.04	0	143	148.167	3.10833	-0.756667	0.182236	1485.67	3.43	0	918	1201.83	1.33667
1447	GO:0016327	apicolateral plasma membrane	240	-3.15667	0.00818574	168.833	-2.26	0	455	311.917	-2.70833	-0.05	0.308031	1866.83	3.53	0	739	1302.92	1.74
3776	GO:0051186	cofactor metabolism	332	3.14667	0.00823028	164.333	0.34	0.321109	1713.5	938.917	1.74333	-4.2	0.000683472	151.667	3.58	0	633	392.333	-0.31
6172	KEGG	Pyruvate_metabolism	90	3.13667	0.00825005	170.833	2.86	0	188	179.417	2.99833	-2.15667	0.024489	760.833	2.75	0	1521	1140.92	0.296667
5856	BioCarta	IFN alpha signaling pathway	20	3.15	0.00829903	163.333	2.58	0	298	230.667	2.865	-3.04667	0.0045241	296.333	-2.13	0	1675	985.667	-2.58833
1878	GO:0015002	heme-copper terminal oxidase activity	35	3.13333	0.00834498	174.833	2.54	0	318	246.417	2.83667	-3.1	0.00415665	279	-2.24	0	1660	969.5	-2.67
3320	GO:0004129	cytochrome-c oxidase activity	35	3.13333	0.00834498	174.833	2.54	0	318	246.417	2.83667	-3.1	0.00415665	279	-2.24	0	1660	969.5	-2.67
3967	GO:0016675	oxidoreductase activity, acting on heme group of donors	35	3.13333	0.00834498	174.833	2.54	0	318	246.417	2.83667	-3.1	0.00415665	279	-2.24	0	1660	969.5	-2.67
3969	GO:0016676	oxidoreductase activity, acting on heme group of donors, oxygen as acceptor	35	3.13333	0.00834498	174.833	2.54	0	318	246.417	2.83667	-3.1	0.00415665	279	-2.24	0	1660	969.5	-2.67
3325	GO:0016886	ligase activity, forming phosphoric ester bonds	113	-3.17333	0.00835554	151	-2.87	0	185	168	-3.02167	-2.91667	0.00554734	366.833	2.05	0	1686	1026.42	-0.433333
126	GO:0045055	regulated secretory pathway	80	-3.15667	0.00842026	160.5	-1.62	0.0884888	755	457.75	-2.38833	3.72	0.000784919	154.167	3.55	0	692	423.083	3.635
4273	GO:0051246	regulation of protein metabolism	386	-3.14	0.00848754	167	-1.62	0.0884888	755	461	-2.38	-1.62333	0.0606606	1030.33	3.57	0	670	850.167	0.973333
2811	GO:0046961	hydrogen-transporting ATPase activity, rotational mechanism	74	3.13	0.00859572	168.5	1.62	0.0785329	951.5	560	2.375	-3.03667	0.00469462	300.167	-2.07	0	1684	992.083	-2.55333
3038	GO:0046933	hydrogen-transporting ATP synthase activity, rotational mechanism	74	3.13	0.00859572	168.5	1.62	0.0785329	951.5	560	2.375	-3.03667	0.00469462	300.167	-2.07	0	1684	992.083	-2.55333
125	GO:0018108	peptidyl-tyrosine phosphorylation	102	-3.15333	0.00861144	161.833	-2.72	0	245	203.417	-2.93667	1.20333	0.112604	1220.33	3.86	0	186	703.167	2.53167
286	GO:0018212	peptidyl-tyrosine modification	102	-3.15333	0.00861144	161.833	-2.72	0	245	203.417	-2.93667	1.20333	0.112604	1220.33	3.86	0	186	703.167	2.53167
4226	GO:0009141	nucleoside triphosphate metabolism	106	3.11333	0.008617	175.5	1	0.1745	1347.5	761.5	2.05667	-3.6	0.00112052	177.167	-3.34	0	1057	617.083	-3.47
5975	BioCarta	Eukaryotic protein translation	24	-3.14667	0.00863523	162.833	-2.8	0	208	185.417	-2.97333	-1.72667	0.0517486	973.333	1.62	0.00590046	1753.5	1363.42	-0.0533333
5981	BioCarta	Erk1/Erk2 Mapk Signaling pathway	84	3.12	0.0086996	173	2.92	0	169	171	3.02	-2.10333	0.0270006	787	3.95	0	86	436.5	0.923333
6114	KEGG	Bile_acid_biosynthesis	67	3.12333	0.00870782	171.333	3.7	0	26	98.6667	3.41167	-2.35333	0.0167133	663.667	4.02	0	56	359.833	0.833333
5888	BioCarta	Regulation of hematopoiesis by cytokines	22	-3.11333	0.0088473	172.5	-3.59	0	41	106.75	-3.35167	0.953333	0.147726	1378	3.08	0	1347	1362.5	2.01667
6082	BioCarta	Regulation of ck1/cdk5 by type 1 glutamate receptors	36	3.10667	0.00888091	175.667	3.59	0	42	108.833	3.34833	-2.13667	0.0253469	771.667	3.17	0	1272	1021.83	0.516667
41	GO:0015931	nucleobase, nucleoside, nucleotide and nucleic acid transport	72	-3.10333	0.00889487	178	-2.57	0	308	243	-2.83667	0.203333	0.280536	1794.67	3.4	0	970	1382.33	1.80167
6140	KEGG	Tryptophan_metabolism	159	3.11333	0.00891216	171.5	1.62	0.0785329	951.5	561.5	2.36667	-2.15333	0.0246269	763.5	3.4	0	961	862.25	0.623333
4181	GO:0006400	tRNA modification	86	-3.10667	0.00899332	175	-2.83	0	199	187	-2.96833	-2.95333	0.00536174	347.833	1.62	0.00590046	1753.5	1050.67	-0.666667
3905	GO:0016651	oxidoreductase activity, acting on NADH or NADPH	122	3.11333	0.00900951	172.667	-2.78	0	218	195.333	0.166667	-6.00667	0.000238604	85.1667	-2.25	0	1659	872.083	-4.12833
5992	BioCarta	PDGF Signaling Pathway	74	3.09	0.00909108	181.167	3.41	0	73	127.083	3.25	-3.08333	0.00435218	275	1.62	0.00590046	1753.5	1014.25	-0.731667
4488	GO:0007548	sex differentiation	103	3.08333	0.00917666	184.5	2.9	0	172	178.25	2.99167	-0.263333	0.270265	1757.83	3.83	0	232	994.917	1.78333
1899	GO:0008289	lipid binding	358	3.08667	0.00921584	179.667	1.25	0.12974	1118	648.833	2.16833	-1.78333	0.0470055	942.667	3.59	0	620	781.333	0.903333
2287	GO:0050871	positive regulation of B cell activation	45	-3.08	0.00927376	184.167	-1.62	0.0884888	755	469.583	-2.35	1.43	0.0812404	1125.33	3.8	0	278	701.667	2.615
6214	KEGG	RNA_polymerase	44	-3.08	0.00928411	186.667	-3.15	0	117	151.833	-3.115	-2.69333	0.00848101	492.667	1.96	0	1696	1094.33	-0.366667
5719	GO:0005200	structural constituent of cytoskeleton	148	-3.09	0.00933994	183.5	-2.02	0	542	362.75	-2.555	0.753333	0.182949	1486.17	3.53	0	742	1114.08	2.14167
3350	GO:0016877	ligase activity, forming carbon-sulfur bonds	40	3.07	0.00940127	186	3.55	0	51	118.5	3.31	-0.756667	0.181536	1482.83	3.44	0	899	1190.92	1.34167
1712	GO:0030203	glycosaminoglycan metabolism	31	-3.09	0.00946345	179.5	-2.9	0	175	177.25	-2.995	-0.636667	0.203693	1544.67	3.06	0	1363	1453.83	1.21167
2549	GO:0006022	aminoglycan metabolism	31	-3.09	0.00946345	179.5	-2.9	0	175	177.25	-2.995	-0.636667	0.203693	1544.67	3.06	0	1363	1453.83	1.21167
4480	GO:0009259	ribonucleotide metabolism	129	3.07	0.00956693	188	1.25	0.12974	1118	653	2.16	-3.45333	0.00191081	194.333	-1	0.0173891	1803.5	998.917	-2.22667
6209	KEGG	Aminoacyl-tRNA_synthetases	40	-3.06333	0.00975632	189.833	-3.41	0	74	131.917	-3.23667	-3.14333	0.00385963	252	-1	0.0173891	1803.5	1027.75	-2.07167
4227	GO:0009142	nucleoside triphosphate biosynthesis	92	3.04333	0.00978793	198.167	0.63	0.252459	1550.5	874.333	1.83667	-3.44667	0.00197873	198.333	-2.93	0	1443	820.667	-3.18833
501	GO:0006904	vesicle docking during exocytosis	44	3.04	0.00983313	198.667	3.42	0	71	134.833	3.23	-2.61333	0.00992961	535.667	2.66	0	1550	1042.83	0.0233333
4703	GO:0048278	vesicle docking	44	3.04	0.00983313	198.667	3.42	0	71	134.833	3.23	-2.61333	0.00992961	535.667	2.66	0	1550	1042.83	0.0233333
6201	KEGG	Limonene_and_pinene_degradation	43	3.06	0.0098377	188	3.17	0	111	149.5	3.115	-2.65333	0.00912963	513.833	2.62	0	1559	1036.42	-0.0166667
6274	mousepaths	Dendritic _ Antigen Presenting Cell	257	3.06333	0.00988792	186.667	1.62	0.0785329	951.5	569.083	2.34167	-2.17	0.0238708	755.667	3.9	0	136	445.833	0.865
5885	BioCarta	METS affect on Macrophage Differentiation	46	-3.04667	0.00990381	197	-3.24	0	102	149.5	-3.14333	-0.95	0.147987	1381.33	3.52	0	760	1070.67	1.285
3034	GO:0019888	protein phosphatase regulator activity	75	-3.05667	0.00992992	191	-2.75	0	231	211	-2.90333	0.233333	0.275143	1775	3.21	0	1236	1505.5	1.72167
