# Supplementary material for: Distinct Early Molecular Responses to Mutations Causing vLINCL and JNCL Presage ATP Synthase Subunit C Accumulation in Cerebellar Cells
Source: PLoS One. 2011 Feb 17;6(2):e17118. doi: 10.1371/journal.pone.0017118 (PMC3040763; doi:10.1371/journal.pone.0017118)
Supplement: Table S7 — Significantly altered gene sets identified by sigPathway analysis of the Cb Cln6 nclf dataset. The significantly altered (q-value<0.01) gene sets, and associated statistics details, are shown for the CbCln6 nclf cells. For comparison, the statistics for these same gene sets are shown for the CbCln3 Δex7/8 cells. For a complete description of the NTk and NEk value determinations, see Materials and Methods. (XLS) [file pone.0017118.s011.xls]

## Sheet: Sheet1
Table S7. Significantly altered gene sets identified by SigPathway analysis of the CbCln6nclf dataset
				CbCln6nclf cells								CbCln3∆ex7/8 cells
IndexG	Gene Set Category	Pathway	Set Size	NTk Stat	NTk q-value	NTk Rank	NEk Stat	NEk q-value	NEk Rank	Mean Rank	Mean Stat	NTk Stat	NTk q-value	NTk Rank	NEk Stat	NEk q-value	NEk Rank	Mean Rank	Mean Stat
40	GO:0005740	mitochondrial membrane	301	-8.69667	0	26.3333	0.8	0.0229084	1825	925.667	-3.94833	6.30333	0	31.6667	2.57	0	305	168.333	4.43667
45	GO:0005743	mitochondrial inner membrane	236	-7.43667	0	42	1.62	0.00590046	1753.5	897.75	-2.90833	5.91333	0	35.6667	2.71	0	249	142.333	4.31167
115	GO:0030001	metal ion transport	669	5.83	0	82.3333	3.91	0	123	102.667	4.87	0.52	0.341017	1501.33	-0.07	0.385304	1831.5	1666.42	0.225
184	GO:0005887	integral to plasma membrane	1061	7.90333	0	35.3333	3.82	0	243	139.167	5.86167	0.26	0.404029	1690.33	-0.07	0.385304	1831.5	1760.92	0.095
185	GO:0045028	purinergic nucleotide receptor activity, G-protein coupled	87	6.29333	0	68.6667	3.56	0	687	377.833	4.92667	-1.83667	0.0865475	645.667	-1	0.180021	1275	960.333	-1.41833
214	GO:0005829	cytosol	630	-9.37	0	21	3.42	0	930	475.5	-2.975	3.41	0.00555189	111.5	-0.07	0.385304	1831.5	971.5	1.67
236	GO:0008066	glutamate receptor activity	78	5.85333	0	81.6667	3.51	0	770	425.833	4.68167	0.47	0.352129	1541.67	2.6	0	286	913.833	1.535
247	GO:0005840	ribosome	381	-10.2833	0	16	-0.34	0.0393066	1856	936	-5.31167	6.85	0	26.3333	2.01	0	545	285.667	4.43
277	GO:0008076	voltage-gated potassium channel complex	106	3.90333	0	147.333	3.46	0	868	507.667	3.68167	-0.63	0.320772	1407.17	-1.25	0.12974	1118	1262.58	-0.94
317	GO:0009986	cell surface	225	5.12667	0	114.667	3.85	0	203	158.833	4.48833	1.45	0.150377	824.667	1.62	0.0785329	951.5	888.083	1.535
380	GO:0006952	defense response	974	5.42	0	100.333	3.84	0	223	161.667	4.63	3.2	0.0073892	154.333	1	0.1745	1347.5	750.917	2.1
384	GO:0006954	inflammatory response	227	4.16333	0	142.333	3.95	0	88	115.167	4.05667	-0.853333	0.272609	1229.17	-1.62	0.0884888	755	992.083	-1.23667
385	GO:0006955	immune response	821	4.33333	0	137	3.84	0	217	177	4.08667	3.40333	0.0053943	100.333	1.25	0.12974	1118	609.167	2.32667
394	GO:0005525	GTP binding	627	-4.93667	0	119	3.78	0	303	211	-0.578333	0.706667	0.302908	1348.67	-1.62	0.0884888	755	1051.83	-0.456667
397	GO:0005529	sugar binding	301	4.26667	0	139.667	3.83	0	236	187.833	4.04833	1.21333	0.193653	981.167	0.07	0.378069	1871.5	1426.33	0.641667
452	GO:0006915	apoptosis	872	-5.4	0	102	3.88	0	165	133.5	-0.76	2.07333	0.0571503	555.167	-1.25	0.12974	1118	836.583	0.411667
489	GO:0020037	heme binding	93	5.18333	0	111.333	3.71	0	401	256.167	4.44667	1.21333	0.194401	978.833	1.62	0.0785329	951.5	965.167	1.41667
533	GO:0019001	guanyl nucleotide binding	642	-5.21667	0	110	3.74	0	363	236.5	-0.738333	0.83	0.276969	1247.17	-1.25	0.12974	1118	1182.58	-0.21
550	GO:0043118	negative regulation of physiological process	1024	-5.63	0	89.3333	3.67	0	480	284.667	-0.98	3.69333	0.00218451	69.1667	-0.34	0.32836	1669.5	869.333	1.67667
596	GO:0016070	RNA metabolism	793	-5.21667	0	109.667	3.18	0	1264	686.833	-1.01833	-7.14667	0	22.6667	-2.73	0	237	129.833	-4.93833
793	GO:0043207	response to external biotic stimulus	540	5.62333	0	90	3.87	0	180	135	4.74667	1.26667	0.186594	930	0.48	0.289867	1608	1269	0.873333
820	GO:0017111	nucleoside-triphosphatase activity	923	-5.73667	0	86.3333	3.63	0	550	318.167	-1.05333	1.05667	0.226283	1088.67	-1.25	0.12974	1118	1103.33	-0.0966667
1104	GO:0007028	cytoplasm organization and biogenesis	243	-7.56333	0	39	-0.34	0.0393066	1856	947.5	-3.95167	-1.37	0.165254	867.833	-2.22	0	472	669.917	-1.795
1159	GO:0007046	ribosome biogenesis	199	-6.82333	0	52	-0.34	0.0393066	1856	954	-3.58167	-0.533333	0.338905	1493.67	-1.62	0.0884888	755	1124.33	-1.07667
1165	GO:0007049	cell cycle	1289	-4.52667	0	130	3.54	0	727	428.5	-0.493333	0.09	0.438256	1825	-1.25	0.12974	1118	1471.5	-0.58
1365	GO:0045184	establishment of protein localization	1396	-10.99	0	9.33333	3.69	0	437	223.167	-3.65	4.49333	0	54.6667	-1	0.180021	1275	664.833	1.74667
1460	GO:0016310	phosphorylation	1391	-6.67333	0	57.6667	3.68	0	467	262.333	-1.49667	1.74667	0.0994735	682.333	-1.25	0.12974	1118	900.167	0.248333
1549	GO:0008188	neuropeptide receptor activity	81	7.48	0	40.6667	3.62	0	562	301.333	5.55	-0.7	0.303326	1353.67	-0.34	0.32836	1669.5	1511.58	-0.52
1578	GO:0042165	neurotransmitter binding	159	9.56333	0	20	3.55	0	705	362.5	6.55667	-1.56667	0.128799	768.333	-1	0.180021	1275	1021.67	-1.28333
1614	GO:0001584	rhodopsin-like receptor activity	452	12.5333	0	1	3.53	0	743	372	8.03167	-1.12333	0.213036	1044	0.07	0.378069	1871.5	1457.75	-0.526667
1668	GO:0016491	oxidoreductase activity	1141	-6.82667	0	52	3.89	0	143	97.5	-1.46833	7.84	0	18	1.62	0.0785329	951.5	484.75	4.73
1731	GO:0016462	pyrophosphatase activity	971	-6.14667	0	73	3.62	0	568	320.5	-1.26333	0.846667	0.273876	1233	-1.25	0.12974	1118	1175.5	-0.201667
1737	GO:0008104	protein localization	1446	-10.84	0	11	3.7	0	425	218	-3.57	4.6	0	51.3333	-1	0.180021	1275	663.167	1.8
1752	GO:0015077	monovalent inorganic cation transporter activity	279	-8.81333	0	24.3333	-1.25	0.0116279	1788.5	906.417	-5.03167	10.97	0	3.33333	2.7	0	252	127.667	6.835
1754	GO:0015078	hydrogen ion transporter activity	266	-8.94667	0	23	-1.66	0	1721	872	-5.30333	11.3867	0	2	2.82	0	204	103	7.10333
1791	GO:0031090	organelle membrane	742	-10.8667	0	11	3.67	0	476	243.5	-3.59833	6	0	34	1.25	0.12974	1118	576	3.625
1820	GO:0045211	postsynaptic membrane	147	6.84667	0	51.3333	3.49	0	800	425.667	5.16833	-1.65333	0.113931	725.333	-1.25	0.12974	1118	921.667	-1.45167
1830	GO:0015031	protein transport	1357	-11.13	0	7.33333	3.69	0	444	225.667	-3.72	4.51667	0	53	-1	0.180021	1275	664	1.75833
1919	GO:0045202	synapse	333	7.53333	0	39.6667	3.62	0	575	307.333	5.57667	-1.57333	0.127756	768.5	-1	0.180021	1275	1021.75	-1.28667
1936	GO:0001653	peptide receptor activity	167	8.66333	0	27.3333	3.63	0	557	292.167	6.14667	-2.28667	0.0394395	469.833	-1.62	0.0884888	755	612.417	-1.95333
1951	GO:0042254	ribosome biogenesis and assembly	213	-6.79	0	54	-0.34	0.0393066	1856	955	-3.565	-0.68	0.309325	1369	-1.96	0	555	962	-1.32
1955	GO:0008227	amine receptor activity	47	4.95333	0	118	3.42	0	941	529.5	4.18667	-0.643333	0.316943	1395.33	0.2	0.35093	1770.5	1582.92	-0.221667
1984	GO:0008219	cell death	927	-5.38	0	103	3.89	0	153	128	-0.745	2.12667	0.0533475	529.333	-1	0.180021	1275	902.167	0.563333
2013	GO:0042277	peptide binding	207	8.09	0	33	3.66	0	494	263.5	5.875	-0.59	0.327547	1434.83	0.34	0.321109	1713.5	1574.17	-0.125
2034	GO:0008236	serine-type peptidase activity	282	4.67	0	126	3.87	0	181	153.5	4.27	-0.826667	0.278125	1251	-1	0.180021	1275	1263	-0.913333
2046	GO:0001614	purinergic nucleotide receptor activity	87	6.29333	0	68.6667	3.56	0	687	377.833	4.92667	-1.83667	0.0865475	645.667	-1	0.180021	1275	960.333	-1.41833
2133	GO:0001608	nucleotide receptor activity, G-protein coupled	87	6.29333	0	68.6667	3.56	0	687	377.833	4.92667	-1.83667	0.0865475	645.667	-1	0.180021	1275	960.333	-1.41833
2241	GO:0009059	macromolecule biosynthesis	1196	-11.7833	0	4	3.46	0	853	428.5	-4.16167	1.64333	0.116101	732.167	-1.62	0.0884888	755	743.583	0.0116667
2281	GO:0019226	transmission of nerve impulse	282	6.11	0	73	3.66	0	483	278	4.885	-2.81667	0.0144483	272.667	-1.62	0.0884888	755	513.833	-2.21833
2297	GO:0050877	neurophysiological process	682	9.12333	0	22	3.72	0	389	205.5	6.42167	-1.36333	0.166546	872.167	-0.8	0.215565	1424	1148.08	-1.08167
2418	GO:0042734	presynaptic membrane	28	4.09667	0	143.333	3.59	0	606	374.667	3.84333	-1.23	0.191073	968.5	-1.62	0.0884888	755	861.75	-1.425
2420	GO:0016265	death	941	-5.33	0	106.333	3.87	0	174	140.167	-0.73	2.41333	0.0314971	417.667	-0.8	0.215565	1424	920.833	0.806667
2473	GO:0030594	neurotransmitter receptor activity	159	9.56333	0	20	3.55	0	705	362.5	6.55667	-1.56667	0.128799	768.333	-1	0.180021	1275	1021.67	-1.28333
2646	GO:0030529	ribonucleoprotein complex	793	-9.77667	0	19	2.92	0	1456	737.5	-3.42833	2.35	0.0353721	442.5	-1	0.180021	1275	858.75	0.675
2684	GO:0015399	primary active transporter activity	352	-8.22667	0	32	2.12	0	1678	855	-3.05333	10.0767	0	9	2.37	0	389	199	6.22333
2924	GO:0007186	G-protein coupled receptor protein signaling pathway	970	10.57	0	13.6667	3.69	0	448	230.833	7.13	-2.42	0.0310637	413	-1.25	0.12974	1118	765.5	-1.835
2950	GO:0019866	inner membrane	291	-7.91667	0	35.3333	1.74	0	1718	876.667	-3.08833	6.44667	0	30	2.6	0	289	159.5	4.52333
3091	GO:0008528	peptide receptor activity, G-protein coupled	167	8.66333	0	27.3333	3.63	0	557	292.167	6.14667	-2.28667	0.0394395	469.833	-1.62	0.0884888	755	612.417	-1.95333
3132	GO:0046906	tetrapyrrole binding	93	5.18333	0	111.333	3.71	0	401	256.167	4.44667	1.21333	0.194401	978.833	1.62	0.0785329	951.5	965.167	1.41667
3134	GO:0046907	intracellular transport	1264	-8.45667	0	30.6667	3.72	0	392	211.333	-2.36833	-0.33	0.388426	1640	-1.62	0.0884888	755	1197.5	-0.975
3319	GO:0016881	acid-amino acid ligase activity	606	-4.48667	0	132.667	3.42	0	937	534.833	-0.533333	1.78	0.0948129	670	-1.25	0.12974	1118	894	0.265
3345	GO:0016874	ligase activity	909	-6.26667	0	69.3333	3.47	0	835	452.167	-1.39833	1.07	0.224598	1080.33	-1.25	0.12974	1118	1099.17	-0.09
3356	GO:0016879	ligase activity, forming carbon-nitrogen bonds	665	-4.64667	0	127.333	3.42	0	925	526.167	-0.613333	1.85333	0.0836903	637.5	-1.25	0.12974	1118	877.75	0.301667
3363	GO:0007264	small GTPase mediated signal transduction	498	-5.34333	0	103.667	3.81	0	261	182.333	-0.766667	1.10333	0.217699	1057.83	-1.62	0.0884888	755	906.417	-0.258333
3369	GO:0007267	cell-cell signaling	413	6.38333	0	65.6667	3.65	0	508	286.833	5.01667	-1.89333	0.0793627	622.333	-1.25	0.12974	1118	870.167	-1.57167
3372	GO:0007268	synaptic transmission	242	6.01667	0	76.6667	3.69	0	446	261.333	4.85333	-2.37	0.0341582	434.833	-1.62	0.0884888	755	594.917	-1.995
3402	GO:0016817	hydrolase activity, acting on acid anhydrides	975	-6.26667	0	69.3333	3.63	0	547	308.167	-1.31833	0.966667	0.247035	1151.67	-1.25	0.12974	1118	1134.83	-0.141667
3404	GO:0016818	hydrolase activity, acting on acid anhydrides, in phosphorus-containing anhydrides	975	-6.26667	0	69.3333	3.63	0	547	308.167	-1.31833	0.966667	0.247035	1151.67	-1.25	0.12974	1118	1134.83	-0.141667
3474	GO:0031420	alkali metal ion binding	298	6.53333	0	61.3333	3.7	0	436	248.667	5.11667	-0.366667	0.378995	1611	-0.34	0.32836	1669.5	1640.25	-0.353333
3493	GO:0004295	trypsin activity	161	5.47667	0	97.3333	3.92	0	117	107.167	4.69833	-0.426667	0.362722	1574.83	-0.34	0.32836	1669.5	1622.17	-0.383333
3551	GO:0004263	chymotrypsin activity	153	5.70333	0	86.3333	3.99	0	67	76.6667	4.84667	-0.443333	0.359393	1561.33	-0.2	0.35093	1770.5	1665.92	-0.321667
3571	GO:0004252	serine-type endopeptidase activity	258	4.52333	0	130.667	3.94	0	98	114.333	4.23167	-0.926667	0.254681	1182.17	-1	0.180021	1275	1228.58	-0.963333
3649	GO:0006357	regulation of transcription from RNA polymerase II promoter	590	-5.53667	0	95	3.72	0	396	245.5	-0.908333	1.91	0.0767582	613	-1	0.180021	1275	944	0.455
3748	GO:0016502	nucleotide receptor activity	87	6.29333	0	68.6667	3.56	0	687	377.833	4.92667	-1.83667	0.0865475	645.667	-1	0.180021	1275	960.333	-1.41833
3831	GO:0015267	channel or pore class transporter activity	719	10.5733	0	13.3333	3.67	0	473	243.167	7.12167	-1.42	0.156187	839.5	-0.63	0.258902	1504	1171.75	-1.025
3833	GO:0015268	alpha-type channel activity	685	10.9167	0	10.3333	3.69	0	438	224.167	7.30333	-0.35	0.383543	1624	0.48	0.289867	1608	1616	0.065
3898	GO:0015276	ligand-gated ion channel activity	161	6.36333	0	66.3333	3.57	0	662	364.167	4.96667	-0.646667	0.316171	1393.5	1.62	0.0785329	951.5	1172.5	0.486667
3945	GO:0006457	protein folding	411	-6.60333	0	60	3.15	0	1293	676.5	-1.72667	-0.3	0.394581	1657.33	-1.62	0.0884888	755	1206.17	-0.96
4042	GO:0006412	protein biosynthesis	1079	-11.6167	0	5	3.38	0	996	500.5	-4.11833	1.40667	0.157745	846.5	-1.62	0.0884888	755	800.75	-0.106667
4051	GO:0030955	potassium ion binding	219	5.79	0	85.6667	3.66	0	492	288.833	4.725	-0.513333	0.342006	1511.5	-1	0.180021	1275	1393.25	-0.756667
4161	GO:0031226	intrinsic to plasma membrane	1068	7.77667	0	36.6667	3.83	0	242	139.333	5.80333	0.376667	0.376618	1607.17	-0.07	0.385304	1831.5	1719.33	0.153333
4170	GO:0004890	GABA-A receptor activity	58	5.38333	0	103	3.64	0	529	316	4.51167	-1.47	0.146001	812.667	-1.62	0.0884888	755	783.833	-1.545
4265	GO:0051242	positive regulation of cellular physiological process	860	-4.73	0	124.667	3.86	0	195	159.833	-0.435	0.976667	0.244241	1143.33	-1.25	0.12974	1118	1130.67	-0.136667
4268	GO:0051243	negative regulation of cellular physiological process	996	-5.54	0	94.6667	3.68	0	460	277.333	-0.93	4.35667	0	56.3333	0.34	0.321109	1713.5	884.917	2.34833
4303	GO:0004888	transmembrane receptor activity	1321	11.5233	0	6	3.77	0	313	159.5	7.64667	2.4	0.0322455	423.5	1	0.1745	1347.5	885.5	1.7
4508	GO:0042981	regulation of apoptosis	532	-5.90333	0	78.6667	3.87	0	178	128.333	-1.01667	4.43667	0.000929632	53.3333	1.62	0.0785329	951.5	502.417	3.02833
4536	GO:0042923	neuropeptide binding	81	7.48	0	40.6667	3.62	0	562	301.333	5.55	-0.7	0.303326	1353.67	-0.34	0.32836	1669.5	1511.58	-0.52
4621	GO:0006259	DNA metabolism	1065	-6.00667	0	76.3333	3.42	0	931	503.667	-1.29333	-0.11	0.433453	1813	-1.25	0.12974	1118	1465.5	-0.68
4793	GO:0007600	sensory perception	424	7.10333	0	45.6667	3.73	0	375	210.333	5.41667	0.256667	0.404265	1690.33	-0.07	0.385304	1831.5	1760.92	0.0933333
4804	GO:0007606	sensory perception of chemical stimulus	101	6.84667	0	51.3333	3.5	0	792	421.667	5.17333	-1.82	0.0890719	653.333	-1.62	0.0884888	755	704.167	-1.72
4807	GO:0007608	perception of smell	72	5.53667	0	93.3333	3.51	0	763	428.167	4.52333	-1.54	0.133288	787	-1.62	0.0884888	755	771	-1.58
4854	GO:0004672	protein kinase activity	1386	-4.78667	0	122.667	3.65	0	517	319.833	-0.568333	-1.01333	0.237031	1113.33	-1.62	0.0884888	755	934.167	-1.31667
4856	GO:0004674	protein serine/threonine kinase activity	1170	-4.40667	0	134.667	3.63	0	552	343.333	-0.388333	-0.956667	0.248196	1156	-1.62	0.0884888	755	955.5	-1.28833
4859	GO:0005386	carrier activity	785	-5.00333	0	116.667	4.24	0	6	61.3333	-0.381667	6.99	0	25.3333	1.62	0.0785329	951.5	488.417	4.305
4933	GO:0009897	external side of plasma membrane	149	4.89	0	120.667	3.85	0	197	158.833	4.37	2.26	0.0417336	478.833	2.88	0	181	329.917	2.57
4955	GO:0016917	GABA receptor activity	62	5.12	0	114	3.53	0	729	421.5	4.325	-0.933333	0.253834	1181.5	-0.8	0.215565	1424	1302.75	-0.866667
5068	GO:0003723	RNA binding	1133	-7.62667	0	38.6667	3.34	0	1069	553.833	-2.14333	-3.81333	0.00144447	69.5	-2.19	0	485	277.25	-3.00167
5095	GO:0005489	electron transporter activity	273	-7.16667	0	43.6667	1.25	0.0116279	1788.5	916.083	-2.95833	2.97333	0.0111351	219.333	-1	0.180021	1275	747.167	0.986667
5103	GO:0012501	programmed cell death	882	-5.44333	0	98.6667	3.89	0	146	122.333	-0.776667	2.19	0.0472588	505.833	-1	0.180021	1275	890.417	0.595
5107	GO:0012505	endomembrane system	451	-5.86333	0	80.3333	3.58	0	648	364.167	-1.14167	2.11333	0.0543679	536	-0.8	0.215565	1424	980	0.656667
5124	GO:0003735	structural constituent of ribosome	440	-10.1767	0	17.6667	0.48	0.0338733	1845	931.333	-4.84833	7.04	0	24	1.91	0	570	297	4.475
5133	GO:0006886	intracellular protein transport	907	-7.96333	0	34.6667	3.82	0	250	142.333	-2.07167	0.916667	0.256905	1189.67	-1.25	0.12974	1118	1153.83	-0.166667
5173	GO:0006811	ion transport	1202	6.54667	0	61.6667	3.86	0	192	126.833	5.20333	0.973333	0.244711	1145.67	0.07	0.378069	1871.5	1508.58	0.521667
5175	GO:0006812	cation transport	824	4.26	0	140	3.89	0	144	142	4.075	2.01	0.0645408	579.667	0.2	0.35093	1770.5	1175.08	1.105
5176	GO:0006813	potassium ion transport	281	6.09333	0	74.3333	3.64	0	537	305.667	4.86667	-0.1	0.436422	1818.33	0.34	0.321109	1713.5	1765.92	0.12
5211	GO:0009581	detection of external stimulus	437	7.05667	0	48	3.71	0	407	227.5	5.38333	0.263333	0.403553	1688.67	-0.07	0.385304	1831.5	1760.08	0.0966667
5226	GO:0043067	regulation of programmed cell death	537	-5.77333	0	85.3333	3.89	0	161	123.167	-0.941667	4.74333	0	50	1.62	0.0785329	951.5	500.75	3.18167
5245	GO:0005198	structural molecule activity	1123	-5.84667	0	81	3.82	0	248	164.5	-1.01333	2.00333	0.0652432	583.333	-1	0.180021	1275	929.167	0.501667
5290	GO:0003823	antigen binding	43	4.28667	0	139.333	4.05	0	35	87.1667	4.16833	-0.78	0.287148	1292.17	-1.25	0.12974	1118	1205.08	-1.015
5304	GO:0043037	translation	303	-6.54667	0	61.3333	2.99	0	1408	734.667	-1.77833	-3.66	0.00260726	78.6667	-2.7	0	253	165.833	-3.18
5418	GO:0006512	ubiquitin cycle	1084	-6.72333	0	55.6667	3.53	0	730	392.833	-1.59667	2.41333	0.0316261	417.833	-1.25	0.12974	1118	767.917	0.581667
5441	GO:0048522	positive regulation of cellular process	937	-4.87	0	120.333	3.83	0	235	177.667	-0.52	0.976667	0.244203	1142.17	-1.25	0.12974	1118	1130.08	-0.136667
5443	GO:0048523	negative regulation of cellular process	1173	-5.24667	0	109	3.78	0	301	205	-0.733333	3.96333	0.000929632	60.3333	-0.07	0.385304	1831.5	945.917	1.94667
5473	GO:0048518	positive regulation of biological process	1120	-5.60333	0	91.3333	3.9	0	141	116.167	-0.851667	1.28333	0.182802	922.167	-1.25	0.12974	1118	1020.08	0.0166667
5474	GO:0048519	negative regulation of biological process	1270	-5.26333	0	108.333	3.79	0	292	200.167	-0.736667	3.79667	0.00168545	63.3333	-0.34	0.32836	1669.5	866.417	1.72833
5504	GO:0009613	response to pest, pathogen or parasite	515	5.57333	0	92.3333	3.86	0	191	141.667	4.71667	1.36667	0.166249	869	0.63	0.252459	1550.5	1209.75	0.998333
5535	GO:0005261	cation channel activity	420	8.51667	0	30	3.71	0	409	219.5	6.11333	-0.62	0.321213	1416.33	0.34	0.321109	1713.5	1564.92	-0.14
5543	GO:0005267	potassium channel activity	220	6.68667	0	57.3333	3.43	0	910	483.667	5.05833	-0.21	0.415139	1726.67	0.34	0.321109	1713.5	1720.08	0.065
5556	GO:0004983	neuropeptide Y receptor activity	68	6.81	0	53.3333	3.6	0	598	325.667	5.205	-0.983333	0.242952	1140.17	-0.63	0.258902	1504	1322.08	-0.806667
5558	GO:0004984	olfactory receptor activity	46	6.24333	0	70.3333	3.5	0	784	427.167	4.87167	-1.08	0.221284	1073.33	-0.48	0.289867	1608	1340.67	-0.78
5580	GO:0009605	response to external stimulus	1253	5.86	0	81	3.7	0	418	249.5	4.78	0.1	0.435962	1817.33	-1	0.180021	1275	1546.17	-0.45
5636	GO:0005216	ion channel activity	630	10.3833	0	15	3.69	0	447	231	7.03667	-0.646667	0.315656	1395	0.48	0.289867	1608	1501.5	-0.0833333
5648	GO:0004930	G-protein coupled receptor activity	646	12.3167	0	2	3.57	0	665	333.5	7.94333	-0.553333	0.335486	1474.67	0.07	0.378069	1871.5	1673.08	-0.241667
5654	GO:0005244	voltage-gated ion channel activity	314	6.42667	0	65	3.66	0	499	282	5.04333	-0.823333	0.277936	1256.67	-0.48	0.289867	1608	1432.33	-0.651667
5659	GO:0005246	calcium channel regulator activity	36	5.78333	0	84.6667	3.83	0	228	156.333	4.80667	-1.26	0.186817	937.167	-1.62	0.0884888	755	846.083	-1.44
5667	GO:0005249	voltage-gated potassium channel activity	159	5.48	0	98.6667	3.46	0	865	481.833	4.47	-0.526667	0.339253	1497	-0.48	0.289867	1608	1552.5	-0.503333
5679	GO:0005230	extracellular ligand-gated ion channel activity	125	6.10667	0	73.6667	3.48	0	823	448.333	4.79333	-0.66	0.313655	1381.33	1.62	0.0785329	951.5	1166.42	0.48
5680	GO:0006629	lipid metabolism	956	-6.8	0	54	3.89	0	158	106	-1.455	3.88667	0.00150107	64	0.34	0.321109	1713.5	888.75	2.11333
5743	GO:0005794	Golgi apparatus	997	-8.74667	0	25.3333	3.85	0	201	113.167	-2.44833	5.34333	0	40.3333	0.07	0.378069	1871.5	955.917	2.70667
5745	GO:0005795	Golgi stack	771	-8.56667	0	29	3.88	0	168	98.5	-2.34333	5.58333	0	38	0.63	0.252459	1550.5	794.25	3.10667
5753	GO:0044255	cellular lipid metabolism	806	-6.54	0	62	3.9	0	131	96.5	-1.32	3.33	0.00604937	126	0.2	0.35093	1770.5	948.25	1.765
5798	GO:0005783	endoplasmic reticulum	1077	-12.1133	0	3	3.72	0	393	198	-4.19667	5.04	0	46.6667	-0.07	0.385304	1831.5	939.083	2.485
5830	BioCarta	CTL mediated immune response against target cells	24	4.01667	0	145	3.95	0	90	117.5	3.98333	1.65667	0.11374	726	1.62	0.0785329	951.5	838.75	1.63833
5931	BioCarta	T Cytotoxic Cell Surface Molecules	27	5.12	0	114	3.76	0	337	225.5	4.44	-0.743333	0.295499	1318.17	-1.25	0.12974	1118	1218.08	-0.996667
5932	BioCarta	T Helper Cell Surface Molecules	24	5.37	0	104	3.86	0	187	145.5	4.615	-0.71	0.302255	1343	-1.25	0.12974	1118	1230.5	-0.98
5965	BioCarta	HIV Induced T Cell Apoptosis	22	4.44667	0	133.667	3.77	0	316	224.833	4.10833	0.723333	0.300075	1336	3.02	0	144	740	1.87167
6118	KEGG	Oxidative_phosphorylation	245	-10.1867	0	17.3333	-2.55	0	1593	805.167	-6.36833	12.3367	0	1	3.11	0	126	63.5	7.72333
6213	KEGG	Ribosome	215	-8.67	0	27	-1	0.0173891	1803.5	915.25	-4.835	8.93	0	12	3.16	0	114	63	6.045
6223	KEGG	Neuroactive_ligand-receptor_interaction	428	11.0833	0	8	3.75	0	349	178.5	7.41667	-1.91333	0.0760807	612.167	-1	0.180021	1275	943.583	-1.45667
6234	KEGG	Cell_adhesion_molecules_CAMs	340	7.06333	0	47.6667	3.8	0	271	159.333	5.43167	2.17	0.0487482	512.667	1.62	0.0785329	951.5	732.083	1.895
259	GO:0005830	cytosolic ribosome (sensu Eukaryota)	125	-5.99667	0.000238604	86.1667	-1.96	0	1697	891.583	-3.97833	6.66667	0	28	3.26	0	97	62.5	4.96333
1032	GO:0046873	metal ion transporter activity	163	-5.97	0.000238604	86.5	-0.63	0.0285501	1830.5	958.5	-3.3	8.69	0	14	3.66	0	32	23	6.175
3905	GO:0016651	oxidoreductase activity, acting on NADH or NADPH	122	-6.00667	0.000238604	85.1667	-2.25	0	1659	872.083	-4.12833	3.11333	0.00900951	172.667	-2.78	0	218	195.333	0.166667
5733	GO:0006605	protein targeting	482	-4.66667	0.000238604	131.167	3.79	0	291	211.083	-0.438333	-0.0566667	0.444394	1846	-1.62	0.0884888	755	1300.5	-0.838333
554	GO:0043119	positive regulation of physiological process	875	-4.36667	0.00023964	137.667	3.84	0	225	181.333	-0.263333	0.74	0.296364	1322	-1.25	0.12974	1118	1220	-0.255
1962	GO:0051082	unfolded protein binding	277	-5.49	0.00023964	98	1.25	0.0116279	1788.5	943.25	-2.12	-0.793333	0.283752	1282.5	-2.24	0	459	870.75	-1.51667
2837	GO:0016788	hydrolase activity, acting on ester bonds	1138	-4.36333	0.00023964	137.333	3.55	0	704	420.667	-0.406667	0.06	0.444815	1849	-1.25	0.12974	1118	1483.5	-0.595
3920	GO:0006468	protein amino acid phosphorylation	1284	-4.34667	0.00023964	139	3.63	0	548	343.5	-0.358333	-0.753333	0.293627	1314.5	-1.62	0.0884888	755	1034.75	-1.18667
2027	GO:0016192	vesicle-mediated transport	686	-4.91667	0.000247236	119.667	3.74	0	362	240.833	-0.588333	2.35667	0.035038	439	-0.48	0.289867	1608	1023.5	0.938333
6232	KEGG	Focal_adhesion	516	-4.55667	0.000247236	134.333	3.68	0	466	300.167	-0.438333	-1.77667	0.0949926	667.833	-1.62	0.0884888	755	711.417	-1.69833
239	GO:0008067	metabotropic glutamate, GABA-B-like receptor activity	32	4.11333	0.000261295	141.833	3.75	0	348	244.917	3.93167	0.356667	0.380968	1619.17	0.34	0.321109	1713.5	1666.33	0.348333
1490	GO:0005911	intercellular junction	277	3.86667	0.000261295	149.5	3.57	0	656	402.75	3.71833	-1.30333	0.178654	909.833	-1.62	0.0884888	755	832.417	-1.46167
2580	GO:0016247	channel regulator activity	45	4.49	0.000261295	129.833	3.99	0	69	99.4167	4.24	-1.08	0.221236	1072.83	-1.25	0.12974	1118	1095.42	-1.165
2897	GO:0007156	homophilic cell adhesion	134	3.94667	0.000261295	147.5	3.19	0	1254	700.75	3.56833	0.383333	0.374932	1604	0.34	0.321109	1713.5	1658.75	0.361667
3224	GO:0015457	auxiliary transport protein activity	45	4.49	0.000261295	129.833	3.99	0	69	99.4167	4.24	-1.08	0.221236	1072.83	-1.25	0.12974	1118	1095.42	-1.165
4785	GO:0019932	second-messenger-mediated signaling	177	4.11333	0.000271067	143.667	3.72	0	384	263.833	3.91667	-2.83	0.0142324	265.333	-1.62	0.0884888	755	510.167	-2.225
5681	GO:0005231	excitatory extracellular ligand-gated ion channel activity	87	4.27667	0.000271067	137.333	3.46	0	862	499.667	3.86833	-0.0266667	0.451116	1868.33	1.62	0.0785329	951.5	1409.92	0.796667
5905	BioCarta	IL 17 Signaling Pathway	30	4.12	0.000449868	148.333	3.52	0	756	452.167	3.82	0.786667	0.285798	1291.33	0.8	0.215565	1424	1357.67	0.793333
5858	BioCarta	Selective expression of chemokine receptors during T-cell polarization	41	3.76	0.000458994	157	3.78	0	309	233	3.77	-0.45	0.357481	1557.83	-0.8	0.215565	1424	1490.92	-0.625
2372	GO:0006091	generation of precursor metabolites and energy	839	-3.96667	0.000485841	155.167	3.84	0	213	184.083	-0.0633333	5.32667	0	41	0.48	0.289867	1608	824.5	2.90333
4215	GO:0009117	nucleotide metabolism	310	-4.34	0.000486877	139.333	3.23	0	1207	673.167	-0.555	1.35	0.169631	882.833	-0.34	0.32836	1669.5	1276.17	0.505
4378	GO:0004842	ubiquitin-protein ligase activity	573	-3.91667	0.000486877	156	3.43	0	920	538	-0.243333	1.89333	0.0788839	619.833	-1.25	0.12974	1118	868.917	0.321667
3374	GO:0007269	neurotransmitter secretion	79	3.72333	0.000513852	152.5	3.48	0	829	490.75	3.60167	-3.18	0.00800093	156.167	-1.62	0.0884888	755	455.583	-2.4
5567	GO:0004970	ionotropic glutamate receptor activity	46	3.82	0.000513852	151.167	3.32	0	1093	622.083	3.57	0.346667	0.3832	1624.5	3.28	0	95	859.75	1.81333
4998	GO:0006732	coenzyme metabolism	294	-4.23	0.000673358	151.167	3.47	0	847	499.083	-0.38	2.90333	0.012734	242.833	0.2	0.35093	1770.5	1006.67	1.55167
3776	GO:0051186	cofactor metabolism	332	-4.2	0.000683472	151.667	3.58	0	633	392.333	-0.31	3.14667	0.00823028	164.333	0.34	0.321109	1713.5	938.917	1.74333
5869	BioCarta	NO2-dependent IL 12 Pathway in NK cells	20	3.74	0.000720935	158	3.76	0	332	245	3.75	-0.596667	0.326945	1430.67	-0.63	0.258902	1504	1467.33	-0.613333
6246	KEGG	Insulin_signaling_pathway	355	-3.72	0.000725481	164.833	3.41	0	945	554.917	-0.155	-0.2	0.417018	1735	-1.62	0.0884888	755	1245	-0.91
126	GO:0045055	regulated secretory pathway	80	3.72	0.000784919	154.167	3.55	0	692	423.083	3.635	-3.15667	0.00842026	160.5	-1.62	0.0884888	755	457.75	-2.38833
5480	GO:0004993	serotonin receptor activity	22	3.72	0.000784919	154.167	3.56	0	686	420.083	3.64	-0.526667	0.34042	1499.17	-0.34	0.32836	1669.5	1584.33	-0.433333
134	GO:0005863	striated muscle thick filament	39	3.73333	0.000810757	165.667	3.09	0	1338	751.833	3.41167	-0.766667	0.289803	1304.33	-0.48	0.289867	1608	1456.17	-0.623333
417	GO:0006974	response to DNA damage stimulus	431	-3.93333	0.000881918	162.333	3.06	0	1360	761.167	-0.436667	0.91	0.257676	1192.83	-0.8	0.215565	1424	1308.42	0.055
3498	GO:0008610	lipid biosynthesis	396	-3.87	0.000881918	165.333	3.92	0	121	143.167	0.025	-0.406667	0.368636	1588.33	-1.62	0.0884888	755	1171.67	-1.01333
5814	GO:0005773	vacuole	257	-3.66	0.000912999	172.167	3.95	0	87	129.583	0.145	8.04667	0	16	2.75	0	232	124	5.39833
2491	GO:0006082	organic acid metabolism	730	-3.66	0.000923113	170.333	3.81	0	262	216.167	0.075	4.54333	0	52.6667	1.62	0.0785329	951.5	502.083	3.08167
2589	GO:0019752	carboxylic acid metabolism	730	-3.66	0.000923113	170.333	3.81	0	262	216.167	0.075	4.54333	0	52.6667	1.62	0.0785329	951.5	502.083	3.08167
2946	GO:0008565	protein transporter activity	326	-3.66	0.000933005	169.833	3.62	0	566	367.917	-0.02	2.20667	0.0459453	496	-0.8	0.215565	1424	960	0.703333
5974	BioCarta	Lck and Fyn tyrosine kinases in initiation of TCR Activation	26	3.66	0.000982571	162	3.51	0	766	464	3.585	-1.08667	0.220028	1070.17	-1.62	0.0884888	755	912.583	-1.35333
5683	GO:0005234	glutamate-gated ion channel activity	43	3.66	0.000982618	161	3.32	0	1104	632.5	3.49	0.503333	0.345005	1520.33	3.34	0	86	803.167	1.92167
4226	GO:0009141	nucleoside triphosphate metabolism	106	-3.6	0.00112052	177.167	-3.34	0	1057	617.083	-3.47	3.11333	0.008617	175.5	1	0.1745	1347.5	761.5	2.05667
3460	GO:0007214	gamma-aminobutyric acid signaling pathway	31	3.62333	0.00116781	164.667	3.24	0	1201	682.833	3.43167	-1.02667	0.233926	1103.67	-1.62	0.0884888	755	929.333	-1.32333
4448	GO:0006119	oxidative phosphorylation	91	-3.56333	0.00126872	182	-2.76	0	1516	849	-3.16167	8.80333	0	13	3.4	0	79	46	6.10167
4129	GO:0050953	sensory perception of light	111	3.51333	0.00132065	180	3.85	0	208	194	3.68167	1.18667	0.199414	1003	1.62	0.0785329	951.5	977.25	1.40333
4796	GO:0007601	visual perception	111	3.51333	0.00132065	180	3.85	0	208	194	3.68167	1.18667	0.199414	1003	1.62	0.0785329	951.5	977.25	1.40333
3749	GO:0016503	pheromone receptor activity	26	3.56333	0.00136512	171	3.39	0	982	576.5	3.47667	-1.05	0.228718	1093.17	-1.25	0.12974	1118	1105.58	-1.15
378	GO:0005578	extracellular matrix (sensu Metazoa)	807	3.56333	0.00136546	172.5	3.92	0	113	142.75	3.74167	1.39333	0.161366	857.333	0.2	0.35093	1770.5	1313.92	0.796667
1973	GO:0031012	extracellular matrix	807	3.56333	0.00136546	172.5	3.92	0	113	142.75	3.74167	1.39333	0.161366	857.333	0.2	0.35093	1770.5	1313.92	0.796667
3915	GO:0016655	oxidoreductase activity, acting on NADH or NADPH, quinone or similar compound as acceptor	85	-4.66333	0.00136669	149.167	-2.71	0	1533	841.083	-3.68667	10.5633	0	7	3.68	0	28	17.5	7.12167
4783	GO:0009719	response to endogenous stimulus	438	-3.76333	0.00139212	177.167	3.09	0	1334	755.583	-0.336667	0.873333	0.267381	1216.33	-0.8	0.215565	1424	1320.17	0.0366667
5537	GO:0005262	calcium channel activity	109	3.57667	0.00143966	173.167	3.79	0	285	229.083	3.68333	-1.08667	0.22018	1066.67	-1.25	0.12974	1118	1092.33	-1.16833
4598	GO:0009205	purine ribonucleoside triphosphate metabolism	91	-3.50333	0.00149063	187	-3.27	0	1164	675.5	-3.38667	3.51667	0.00424468	89.6667	1.62	0.0785329	951.5	520.583	2.56833
5090	GO:0015672	monovalent inorganic cation transport	483	3.50333	0.00156277	178.833	3.66	0	496	337.417	3.58167	2.26667	0.0413325	474.5	1.62	0.0785329	951.5	713	1.94333
5340	GO:0005179	hormone activity	137	3.46	0.00161175	186.833	3.63	0	541	363.917	3.545	-0.196667	0.417751	1741.5	0.07	0.378069	1871.5	1806.5	-0.0633333
4005	GO:0009199	ribonucleoside triphosphate metabolism	95	-3.46667	0.00164872	191.333	-3.27	0	1169	680.167	-3.36833	3.5	0.00445135	92	1.93	0	564	328	2.715
4230	GO:0009144	purine nucleoside triphosphate metabolism	94	-3.46667	0.00164872	191.333	-3.26	0	1178	684.667	-3.36333	3.39333	0.00538513	107.667	1.62	0.0785329	951.5	529.583	2.50667
4320	GO:0006163	purine nucleotide metabolism	129	-3.46667	0.00167796	190.667	-0.8	0.0229084	1825	1007.83	-2.13333	2.35333	0.0349578	442.5	-0.48	0.289867	1608	1025.25	0.936667
5354	GO:0005125	cytokine activity	328	3.47667	0.00171962	183.667	3.83	0	237	210.333	3.65333	-0.316667	0.391992	1646.67	-0.34	0.32836	1669.5	1658.08	-0.328333
512	GO:0003954	NADH dehydrogenase activity	80	-3.47333	0.00175673	192.667	-2.78	0	1507	849.833	-3.12667	10.8733	0	5.33333	3.65	0	35	20.1667	7.26167
1305	GO:0050136	NADH dehydrogenase (quinone) activity	80	-3.47333	0.00175673	192.667	-2.78	0	1507	849.833	-3.12667	10.8733	0	5.33333	3.65	0	35	20.1667	7.26167
1679	GO:0008137	NADH dehydrogenase (ubiquinone) activity	80	-3.47333	0.00175673	192.667	-2.78	0	1507	849.833	-3.12667	10.8733	0	5.33333	3.65	0	35	20.1667	7.26167
1720	GO:0015081	sodium ion transporter activity	80	-3.47333	0.00175673	192.667	-2.78	0	1507	849.833	-3.12667	10.8733	0	5.33333	3.65	0	35	20.1667	7.26167
5502	GO:0009611	response to wounding	415	3.43	0.00190995	189	3.87	0	170	179.5	3.65	-0.376667	0.375457	1604	-1.25	0.12974	1118	1361	-0.813333
4109	GO:0009152	purine ribonucleotide biosynthesis	101	-3.45333	0.00191081	194.333	-2.99	0	1409	801.667	-3.22167	2.98667	0.0110209	213.5	1	0.1745	1347.5	780.5	1.99333
4480	GO:0009259	ribonucleotide metabolism	129	-3.45333	0.00191081	194.333	-1	0.0173891	1803.5	998.917	-2.22667	3.07	0.00956693	188	1.25	0.12974	1118	653	2.16
3303	GO:0016853	isomerase activity	231	-3.45333	0.0019246	194.667	3.38	0	994	594.333	-0.0366667	2.80667	0.0154261	272	1.25	0.12974	1118	695	2.02833
4227	GO:0009142	nucleoside triphosphate biosynthesis	92	-3.44667	0.00197873	198.333	-2.93	0	1443	820.667	-3.18833	3.04333	0.00978793	198.167	0.63	0.252459	1550.5	874.333	1.83667
4317	GO:0004879	ligand-dependent nuclear receptor activity	125	3.42333	0.00203076	198.5	3.97	0	78	138.25	3.69667	0.29	0.39712	1669.5	-1	0.180021	1275	1472.25	-0.355
5162	GO:0003707	steroid hormone receptor activity	125	3.42333	0.00203076	198.5	3.97	0	78	138.25	3.69667	0.29	0.39712	1669.5	-1	0.180021	1275	1472.25	-0.355
4450	GO:0009260	ribonucleotide biosynthesis	109	-3.43667	0.00203284	197.667	-2.62	0	1558	877.833	-3.02833	2.95	0.0116463	225.333	1	0.1745	1347.5	786.417	1.975
5859	BioCarta	Th1/Th2 Differentiation	34	3.42333	0.00203508	199	3.86	0	183	191	3.64167	-0.266667	0.401588	1685	0.8	0.215565	1424	1554.5	0.266667
1751	GO:0015075	ion transporter activity	1252	3.41333	0.0020676	191.333	3.89	0	155	173.167	3.65167	5.22667	0	43.3333	1.62	0.0785329	951.5	497.417	3.42333
4231	GO:0009145	purine nucleoside triphosphate biosynthesis	85	-3.40333	0.00207007	201.5	-3.02	0	1381	791.25	-3.21167	3.45333	0.00492026	100.667	1.62	0.0785329	951.5	526.083	2.53667
4590	GO:0009201	ribonucleoside triphosphate biosynthesis	85	-3.40333	0.00207007	201.5	-3.02	0	1381	791.25	-3.21167	3.45333	0.00492026	100.667	1.62	0.0785329	951.5	526.083	2.53667
4601	GO:0009206	purine ribonucleoside triphosphate biosynthesis	85	-3.40333	0.00207007	201.5	-3.02	0	1381	791.25	-3.21167	3.45333	0.00492026	100.667	1.62	0.0785329	951.5	526.083	2.53667
2084	GO:0001637	G-protein chemoattractant receptor activity	43	3.40333	0.00207275	193	3.5	0	778	485.5	3.45167	-0.72	0.300029	1336.67	-0.63	0.258902	1504	1420.33	-0.675
4700	GO:0019956	chemokine binding	43	3.40333	0.00207275	193	3.5	0	778	485.5	3.45167	-0.72	0.300029	1336.67	-0.63	0.258902	1504	1420.33	-0.675
5531	GO:0004950	chemokine receptor activity	43	3.40333	0.00207275	193	3.5	0	778	485.5	3.45167	-0.72	0.300029	1336.67	-0.63	0.258902	1504	1420.33	-0.675
4674	GO:0000151	ubiquitin ligase complex	461	-3.53	0.00207853	198.167	3.5	0	793	495.583	-0.015	2.73	0.0174575	302	-0.07	0.385304	1831.5	1066.75	1.33
4102	GO:0009150	purine ribonucleotide metabolism	114	-3.39333	0.00209832	201.667	-2.04	0	1688	944.833	-2.71667	3	0.0106666	209	1	0.1745	1347.5	778.25	2
761	GO:0043235	receptor complex	117	3.40333	0.00212938	197	3.86	0	189	193	3.63167	-5.02	0	47	-3	0	149	98	-4.01
5987	BioCarta	MAPKinase Signaling Pathway	212	-3.37667	0.00222036	205	3.61	0	593	399	0.116667	1.13	0.211745	1037.67	-1.25	0.12974	1118	1077.83	-0.06
390	GO:0006959	humoral immune response	146	3.37667	0.00224974	195.333	3.58	0	629	412.167	3.47833	0.313333	0.391876	1648.17	-0.07	0.385304	1831.5	1739.83	0.121667
2393	GO:0042742	defense response to bacteria	63	3.38667	0.00227375	200.333	3.74	0	368	284.167	3.56333	-1.25667	0.18737	942.333	-1.25	0.12974	1118	1030.17	-1.25333
3626	GO:0006366	transcription from RNA polymerase II promoter	691	-3.37667	0.00227604	202.167	3.89	0	160	181.083	0.256667	1.78	0.0941628	669.333	-1.25	0.12974	1118	893.667	0.265
4321	GO:0006164	purine nucleotide biosynthesis	110	-3.35667	0.00228576	205.333	-2.6	0	1566	885.667	-2.97833	2.48333	0.0282732	383.5	-0.48	0.289867	1608	995.75	1.00167
5589	GO:0005272	sodium channel activity	29	3.41667	0.00229221	196.667	3.58	0	631	413.833	3.49833	-0.713333	0.301828	1342.67	-1.62	0.0884888	755	1048.83	-1.16667
1677	GO:0008135	translation factor activity, nucleic acid binding	250	-3.35	0.00230216	205.167	3.21	0	1224	714.583	-0.07	-4.06333	0	59	-2.51	0	333	196	-3.28667
6281	mousepaths	DNA Damage Signaling Pathway	228	-3.34	0.0024078	208.667	2.95	0	1437	822.833	-0.195	0.196667	0.416859	1736.67	-1.62	0.0884888	755	1245.83	-0.711667
1363	GO:0045182	translation regulator activity	259	-3.34	0.0024123	208.5	3.25	0	1189	698.75	-0.045	-3.73	0.00195016	75.1667	-2.48	0	348	211.583	-3.105
4787	GO:0019933	cAMP-mediated signaling	95	3.35667	0.00243341	205.167	3.36	0	1028	616.583	3.35833	0.56	0.334377	1464.33	0.34	0.321109	1713.5	1588.92	0.45
4641	GO:0009790	embryonic development	504	-3.34	0.00246925	213.167	3.72	0	388	300.583	0.19	-1.01667	0.235895	1108	-1.62	0.0884888	755	931.5	-1.31833
6263	mousepaths	Hypoxia Signaling Pathway	219	-3.37667	0.0025205	212	3.94	0	102	157	0.281667	1.97333	0.0692138	593.333	-1	0.180021	1275	934.167	0.486667
4305	GO:0004889	nicotinic acetylcholine-activated cation-selective channel activity	27	3.30667	0.00268826	222.333	3.48	0	812	517.167	3.39333	-0.79	0.284886	1285.33	-0.8	0.215565	1424	1354.67	-0.795
4790	GO:0019935	cyclic-nucleotide-mediated signaling	101	3.30333	0.00271566	215.333	3.43	0	903	559.167	3.36667	0.683333	0.308423	1361.5	0.63	0.252459	1550.5	1456	0.656667
1270	GO:0007001	chromosome organization and biogenesis (sensu Eukaryota)	464	-3.31667	0.00272335	219	3.58	0	655	437	0.131667	-0.803333	0.282976	1272.67	-2.21	0	476	874.333	-1.50667
5655	GO:0004935	adrenoceptor activity	25	3.29333	0.00278765	213.333	3.5	0	779	496.167	3.39667	-0.223333	0.413459	1716.17	0.2	0.35093	1770.5	1743.33	-0.0116667
174	GO:0008092	cytoskeletal protein binding	718	-3.29333	0.00279891	219	3.56	0	678	448.5	0.133333	-2.05	0.0597561	565	-1.62	0.0884888	755	660	-1.835
2071	GO:0045764	positive regulation of amino acid metabolism	30	3.27333	0.00289334	217.833	3.54	0	709	463.417	3.40667	-5.96333	0.000623352	42.5	-2.78	0	215	128.75	-4.37167
3254	GO:0001934	positive regulation of protein amino acid phosphorylation	30	3.27333	0.00289334	217.833	3.54	0	709	463.417	3.40667	-5.96333	0.000623352	42.5	-2.78	0	215	128.75	-4.37167
6226	KEGG	Wnt_signaling_pathway	418	-3.26	0.00292983	222.833	3.86	0	188	205.417	0.3	2.55333	0.024789	354	0.34	0.321109	1713.5	1033.75	1.44667
506	GO:0005694	chromosome	528	-3.27	0.0029337	221.5	3.33	0	1087	654.25	0.03	-1.36667	0.165687	870.333	-1.62	0.0884888	755	812.667	-1.49333
4139	GO:0000323	lytic vacuole	234	-3.26	0.00296605	220.833	3.9	0	138	179.417	0.32	7.87667	0	17.6667	2.87	0	183	100.333	5.37333
5769	GO:0005764	lysosome	234	-3.26	0.00296605	220.833	3.9	0	138	179.417	0.32	7.87667	0	17.6667	2.87	0	183	100.333	5.37333
6278	mousepaths	Insulin Signaling Pathway	224	-3.26333	0.00301092	226	3.22	0	1219	722.5	-0.0216667	0.28	0.398579	1676.67	-1	0.180021	1275	1475.83	-0.36
1787	GO:0001505	regulation of neurotransmitter levels	110	3.26	0.00301657	228	3.58	0	628	428	3.42	-2.67	0.019842	316.167	-1.62	0.0884888	755	535.583	-2.145
4201	GO:0051276	chromosome organization and biogenesis	492	-3.25333	0.00304552	227.167	3.52	0	758	492.583	0.133333	-0.996667	0.240415	1129.67	-2.17	0	496	812.833	-1.58333
4412	GO:0045941	positive regulation of transcription	406	-3.25333	0.00306983	229.833	3.74	0	360	294.917	0.243333	1.13333	0.210713	1036.33	-1.25	0.12974	1118	1077.17	-0.0583333
4441	GO:0045935	positive regulation of nucleobase, nucleoside, nucleotide and nucleic acid metabolism	406	-3.25333	0.00306983	229.833	3.74	0	360	294.917	0.243333	1.13333	0.210713	1036.33	-1.25	0.12974	1118	1077.17	-0.0583333
5061	GO:0006897	endocytosis	359	-3.24333	0.0030982	230	4.08	0	28	129	0.418333	1.02667	0.233327	1102.33	-0.8	0.215565	1424	1263.17	0.113333
3326	GO:0016887	ATPase activity	585	-3.24	0.0030987	225.167	3.58	0	639	432.083	0.17	1.30333	0.178215	911.5	-1.25	0.12974	1118	1014.75	0.0266667
1501	GO:0008168	methyltransferase activity	301	-3.23667	0.00317339	229.667	3.72	0	394	311.833	0.241667	-1.08333	0.220902	1067.67	-1.62	0.0884888	755	911.333	-1.35167
6286	mousepaths	Cancer PathwayFinder	235	-3.22333	0.00323671	229	3.4	0	972	600.5	0.0883333	-0.466667	0.354005	1544.83	-1.62	0.0884888	755	1149.92	-1.04333
2326	GO:0042773	ATP synthesis coupled electron transport	30	-3.21667	0.00328883	246.167	-2.32	0	1651	948.583	-2.76833	8.39	0	15	4.15	0	4	9.5	6.27
1133	GO:0042461	photoreceptor cell development	22	3.21333	0.00329185	236.667	3.76	0	327	281.833	3.48667	-0.303333	0.394143	1658.33	-0.63	0.258902	1504	1581.17	-0.466667
459	GO:0006941	striated muscle contraction	40	3.20667	0.00329623	239.167	3.25	0	1195	717.083	3.22833	-0.76	0.29217	1307.33	-0.2	0.35093	1770.5	1538.92	-0.48
2324	GO:0045893	positive regulation of transcription, DNA-dependent	318	-3.19667	0.00344297	236.5	3.75	0	355	295.75	0.276667	0.66	0.312817	1379.67	-1.62	0.0884888	755	1067.33	-0.48
52	GO:0005747	respiratory chain complex I (sensu Eukaryota)	24	-3.20667	0.00344421	255.833	-1.62	0.00605901	1729.5	992.667	-2.41333	2.79333	0.0149833	281.333	2.87	0	186	233.667	2.83167
1772	GO:0045271	respiratory chain complex I	24	-3.20667	0.00344421	255.833	-1.62	0.00605901	1729.5	992.667	-2.41333	2.79333	0.0149833	281.333	2.87	0	186	233.667	2.83167
6021	BioCarta	The IGF-1 Receptor and Longevity	40	-3.19667	0.00345726	236.5	-2.66	0	1549	892.75	-2.92833	1.59333	0.124215	754.5	0.2	0.35093	1770.5	1262.5	0.896667
3564	GO:0006396	RNA processing	668	-3.19	0.00349913	239.833	3.18	0	1266	752.917	-0.005	-6.31	0	32	-2.67	0	267	149.5	-4.49
2449	GO:0006066	alcohol metabolism	392	-3.18333	0.0035255	240.833	3.76	0	335	287.917	0.288333	1.25667	0.18755	940.167	-1	0.180021	1275	1107.58	0.128333
6271	mousepaths	Osteogenesis	215	-3.18	0.00356559	246.5	3.09	0	1336	791.25	-0.045	1.42	0.156262	840	-1	0.180021	1275	1057.5	0.21
4416	GO:0045944	positive regulation of transcription from RNA polymerase II promoter	283	-3.18	0.00356891	240.333	3.55	0	702	471.167	0.185	1.15333	0.205655	1026.5	-1.25	0.12974	1118	1072.25	-0.0483333
5855	BioCarta	The Co-Stimulatory Signal During T-cell Activation	51	3.16333	0.00362422	257.333	3.58	0	635	446.167	3.37167	-0.11	0.433254	1812.5	-0.07	0.385304	1831.5	1822	-0.09
6280	mousepaths	Androgen Signaling and Prostate Cancer	210	-3.17333	0.00363868	245.5	3.84	0	215	230.25	0.333333	1.82667	0.0873116	650.333	0.07	0.378069	1871.5	1260.92	0.948333
5695	GO:0006643	membrane lipid metabolism	239	-3.17	0.00365233	245.333	3.8	0	282	263.667	0.315	-0.966667	0.246864	1154.17	-1.62	0.0884888	755	954.583	-1.29333
1748	GO:0045259	proton-transporting ATP synthase complex	31	-3.15667	0.00371244	249	-3.14	0	1301	775	-3.14833	2.90333	0.0126135	241.333	2.32	0	418	329.667	2.61167
1827	GO:0050790	regulation of enzyme activity	308	-3.15667	0.00373351	250.167	3.76	0	342	296.083	0.301667	-1.15333	0.205357	1025.17	-1.62	0.0884888	755	890.083	-1.38667
4780	GO:0019941	modification-dependent protein catabolism	271	-3.15667	0.00376246	252.5	3.38	0	998	625.25	0.111667	1.50667	0.138731	801.333	-0.63	0.258902	1504	1152.67	0.438333
5416	GO:0006511	ubiquitin-dependent protein catabolism	271	-3.15667	0.00376246	252.5	3.38	0	998	625.25	0.111667	1.50667	0.138731	801.333	-0.63	0.258902	1504	1152.67	0.438333
2330	GO:0042775	ATP synthesis coupled electron transport (sensu Eukaryota)	25	-3.15	0.0037922	264	-1	0.0173891	1803.5	1033.75	-2.075	3.5	0.00445481	91.5	4.15	0	5	48.25	3.825
5520	GO:0048500	signal recognition particle	23	-3.14667	0.00379586	254	-1.94	0	1699	976.5	-2.54333	1.23333	0.190961	965	0.48	0.289867	1608	1286.5	0.856667
5801	GO:0005786	signal recognition particle (sensu Eukaryota)	23	-3.14667	0.00379586	254	-1.94	0	1699	976.5	-2.54333	1.23333	0.190961	965	0.48	0.289867	1608	1286.5	0.856667
6034	BioCarta	IGF-1 Signaling Pathway	54	-3.14667	0.00379586	254	1.62	0.00590046	1753.5	1003.75	-0.763333	1.72667	0.102457	691.667	1.93	0	563	627.333	1.82833
3473	GO:0007243	protein kinase cascade	311	-3.14667	0.0037985	255.5	4.07	0	33	144.25	0.461667	-0.28	0.398327	1674.67	-1.62	0.0884888	755	1214.83	-0.95
3210	GO:0015450	protein translocase activity	28	-3.14667	0.00383256	254.667	-1.62	0.00605901	1729.5	992.083	-2.38333	2.47333	0.0285654	386.833	2.79	0	211	298.917	2.63167
6209	KEGG	Aminoacyl-tRNA_synthetases	40	-3.14333	0.00385963	252	-1	0.0173891	1803.5	1027.75	-2.07167	-3.06333	0.00975632	189.833	-3.41	0	74	131.917	-3.23667
3121	GO:0019814	immunoglobulin complex	23	3.14	0.00389141	257.833	3.69	0	443	350.417	3.415	-6.42333	0.000636574	39.1667	-3.66	0	33	36.0833	-5.04167
6050	BioCarta	ADP-Ribosylation Factor	32	-3.14	0.00389195	255.167	-2.58	0	1573	914.083	-2.86	2.63333	0.0212668	327.833	2.65	0	271	299.417	2.64167
5493	GO:0006505	GPI anchor metabolism	34	-3.13667	0.00390891	284	-1.25	0.0116279	1788.5	1036.25	-2.19333	0.946667	0.250961	1170	0.63	0.252459	1550.5	1360.25	0.788333
3018	GO:0030674	protein binding, bridging	35	-3.13667	0.00392726	256.167	-3.44	0	897	576.583	-3.28833	-1.75333	0.0984003	680.667	-3.13	0	120	400.333	-2.44167
6199	KEGG	Porphyrin_and_chlorophyll_metabolism	42	-3.13333	0.0039403	271.5	-2.42	0	1626	948.75	-2.77667	10.8333	0	5.33333	4.34	0	1	3.16667	7.58667
5991	BioCarta	Erythropoietin mediated neuroprotection through NF-kB	28	-3.13333	0.00395121	255.167	-1.9	0	1704	979.583	-2.51667	2.14333	0.0513491	522.167	1.61	0.0784622	1007	764.583	1.87667
3532	GO:0042623	ATPase activity, coupled	546	-3.13667	0.00395939	259.5	3.53	0	733	496.25	0.196667	0.553333	0.335487	1470.67	-1.25	0.12974	1118	1294.33	-0.348333
944	GO:0042327	positive regulation of phosphorylation	28	3.12333	0.00396016	267.167	3.55	0	701	484.083	3.33667	-6.25667	0.000623352	39.8333	-2.48	0	349	194.417	-4.36833
2057	GO:0050731	positive regulation of peptidyl-tyrosine phosphorylation	28	3.12333	0.00396016	267.167	3.55	0	701	484.083	3.33667	-6.25667	0.000623352	39.8333	-2.48	0	349	194.417	-4.36833
4445	GO:0045937	positive regulation of phosphate metabolism	28	3.12333	0.00396016	267.167	3.55	0	701	484.083	3.33667	-6.25667	0.000623352	39.8333	-2.48	0	349	194.417	-4.36833
5177	GO:0046034	ATP metabolism	78	-3.13667	0.00396739	259.167	-2.59	0	1571	915.083	-2.86333	3.40333	0.00517127	109.667	1.89	0	583	346.333	2.64667
3507	GO:0031418	L-ascorbic acid binding	25	-3.12333	0.00397695	260.167	-2.58	0	1577	918.583	-2.85167	-1.27	0.186558	931.667	-3.28	0	94	512.833	-2.275
2931	GO:0016741	transferase activity, transferring one-carbon groups	308	-3.11333	0.00406534	269.5	3.71	0	399	334.25	0.298333	-1.37	0.165717	869.667	-1.62	0.0884888	755	812.333	-1.495
5463	GO:0005104	fibroblast growth factor receptor binding	48	3.09667	0.00409951	293.833	4.02	0	54	173.917	3.55833	-0.44	0.35927	1562	-0.48	0.289867	1608	1585	-0.46
1878	GO:0015002	heme-copper terminal oxidase activity	35	-3.1	0.00415665	279	-2.24	0	1660	969.5	-2.67	3.13333	0.00834498	174.833	2.54	0	318	246.417	2.83667
3320	GO:0004129	cytochrome-c oxidase activity	35	-3.1	0.00415665	279	-2.24	0	1660	969.5	-2.67	3.13333	0.00834498	174.833	2.54	0	318	246.417	2.83667
3967	GO:0016675	oxidoreductase activity, acting on heme group of donors	35	-3.1	0.00415665	279	-2.24	0	1660	969.5	-2.67	3.13333	0.00834498	174.833	2.54	0	318	246.417	2.83667
3969	GO:0016676	oxidoreductase activity, acting on heme group of donors, oxygen as acceptor	35	-3.1	0.00415665	279	-2.24	0	1660	969.5	-2.67	3.13333	0.00834498	174.833	2.54	0	318	246.417	2.83667
6205	KEGG	Caprolactam_degradation	26	-3.09667	0.00415896	287.167	-1.62	0.00605901	1729.5	1008.33	-2.35833	2.31667	0.0374459	458.5	3.12	0	121	289.75	2.71833
5863	BioCarta	Oxidative Stress Induced Gene Expression Via Nrf2	46	-3.1	0.00418203	269.167	-0.07	0.0499036	1882	1075.58	-1.585	1.10333	0.217385	1057.33	0.8	0.215565	1424	1240.67	0.951667
1042	GO:0045444	fat cell differentiation	37	-3.08667	0.00421802	281.667	1.85	0	1708	994.833	-0.618333	2.92	0.0123932	235.667	3.87	0	14	124.833	3.395
4159	GO:0000315	organellar large ribosomal subunit	35	-3.09	0.00423447	272.667	-1.62	0.00605901	1729.5	1001.08	-2.355	-0.32	0.389483	1644.67	-1.62	0.0884888	755	1199.83	-0.97
5766	GO:0005762	mitochondrial large ribosomal subunit	35	-3.09	0.00423447	272.667	-1.62	0.00605901	1729.5	1001.08	-2.355	-0.32	0.389483	1644.67	-1.62	0.0884888	755	1199.83	-0.97
6218	KEGG	Protein_export	30	-3.08667	0.00425891	281.5	-1	0.0173891	1803.5	1042.5	-2.04333	2.47	0.0290784	388.5	2.46	0	357	372.75	2.465
6119	KEGG	ATP_synthesis	82	-3.08667	0.00433824	275.167	-2.36	0	1643	959.083	-2.72333	3.42	0.00512366	103.667	1.93	0	565	334.333	2.675
3157	GO:0042578	phosphoric ester hydrolase activity	595	-3.07333	0.00433981	283	3.41	0	949	616	0.168333	0.303333	0.394778	1658.33	-1.25	0.12974	1118	1388.17	-0.473333
205	GO:0046474	glycerophospholipid biosynthesis	57	-3.07333	0.00435013	288.333	-1.25	0.0116279	1788.5	1038.42	-2.16167	0.47	0.352544	1541.67	-2.04	0	541	1041.33	-0.785
1112	GO:0030175	filopodium	24	-3.08333	0.00435218	275	-3.27	0	1160	717.5	-3.17667	-2.06	0.0585481	562.167	-2.96	0	164	363.083	-2.51
5992	BioCarta	PDGF Signaling Pathway	74	-3.08333	0.00435218	275	1.62	0.00590046	1753.5	1014.25	-0.731667	3.09	0.00909108	181.167	3.41	0	73	127.083	3.25
3952	GO:0004713	protein-tyrosine kinase activity	795	-3.08	0.00435756	283	3.62	0	563	423	0.27	-0.336667	0.386416	1635.5	-1.62	0.0884888	755	1195.25	-0.978333
5706	GO:0006631	fatty acid metabolism	262	-3.07	0.00437971	281.833	3.29	0	1130	705.917	0.11	3.42	0.00523221	98	1.62	0.0785329	951.5	524.75	2.52
4782	GO:0000139	Golgi membrane	80	-3.07	0.00438311	287.167	-0.34	0.0393066	1856	1071.58	-1.705	2.77	0.0158317	288	2.32	0	420	354	2.545
5286	GO:0005164	tumor necrosis factor receptor binding	29	3.07333	0.00438918	287.833	3.66	0	507	397.417	3.36667	0.17	0.421446	1761.5	0.48	0.289867	1608	1684.75	0.325
193	GO:0046489	phosphoinositide biosynthesis	29	-3.06333	0.00439868	294.833	-1.62	0.00605901	1729.5	1012.17	-2.34167	1.16333	0.204336	1018.67	1.58	0.0783214	1008	1013.33	1.37167
5495	GO:0006506	GPI anchor biosynthesis	29	-3.06333	0.00439868	294.833	-1.62	0.00605901	1729.5	1012.17	-2.34167	1.16333	0.204336	1018.67	1.58	0.0783214	1008	1013.33	1.37167
6105	KEGG	Pentose_and_glucuronate_interconversions	26	-3.07333	0.00439932	286.167	-0.07	0.0499036	1882	1084.08	-1.57167	2.68	0.0194487	312.5	2.8	0	207	259.75	2.74
2468	GO:0016282	eukaryotic 43S preinitiation complex	63	-3.06667	0.00441032	286.833	-1.91	0	1701	993.917	-2.48833	2.39333	0.0326379	423.333	2.35	0	400	411.667	2.37167
4880	GO:0006753	nucleoside phosphate metabolism	72	-3.07333	0.00441719	282.667	-2.51	0	1605	943.833	-2.79167	3.2	0.00751154	150.167	1.62	0.0785329	951.5	550.833	2.41
4882	GO:0006754	ATP biosynthesis	72	-3.07333	0.00441719	282.667	-2.51	0	1605	943.833	-2.79167	3.2	0.00751154	150.167	1.62	0.0785329	951.5	550.833	2.41
3019	GO:0000074	regulation of progression through cell cycle	671	-3.06333	0.00446412	292.167	3.61	0	586	439.083	0.273333	-0.01	0.453827	1879	-1.62	0.0884888	755	1317	-0.815
48	GO:0015935	small ribosomal subunit	89	-3.06667	0.00448356	284.167	-0.34	0.0393066	1856	1070.08	-1.70333	2.54	0.0256809	361	2.36	0	395	378	2.45
3439	GO:0008654	phospholipid biosynthesis	105	-3.06333	0.00448564	284.167	0.8	0.0229084	1825	1054.58	-1.13167	-1.66	0.113047	725.167	-2.58	0	301	513.083	-2.12
5506	GO:0009617	response to bacteria	78	3.04667	0.0044891	307	3.53	0	745	526	3.28833	-0.993333	0.240581	1127.67	-1.25	0.12974	1118	1122.83	-1.12167
5254	GO:0043021	ribonucleoprotein binding	34	-3.06333	0.00451037	289.5	-2.11	0	1680	984.75	-2.58667	-0.07	0.442049	1838.33	-1.62	0.0884888	755	1296.67	-0.845
6288	mousepaths	p53 Signaling Pathway	253	-3.06333	0.00451037	289.5	3.63	0	549	419.25	0.283333	2.24	0.0432832	482.833	0.8	0.215565	1424	953.417	1.52
3707	GO:0006323	DNA packaging	411	-3.06	0.00451751	298.5	3.63	0	558	428.25	0.285	-1.60667	0.121802	748.667	-2.52	0	327	537.833	-2.06333
5856	BioCarta	IFN alpha signaling pathway	20	-3.04667	0.0045241	296.333	-2.13	0	1675	985.667	-2.58833	3.15	0.00829903	163.333	2.58	0	298	230.667	2.865
3569	GO:0006399	tRNA metabolism	138	-3.04667	0.00452896	302.5	2.28	0	1656	979.25	-0.383333	-4.06667	0.00125993	68.3333	-2.96	0	162	115.167	-3.51333
1512	GO:0005942	phosphoinositide 3-kinase complex	26	-3.03667	0.0045707	304.833	-2.62	0	1561	932.917	-2.82833	1.31333	0.176609	906.167	2.29	0	433	669.583	1.80167
2895	GO:0007155	cell adhesion	1019	3.05667	0.00457813	289.5	3.81	0	264	276.75	3.43333	1.21333	0.195029	982.5	-0.63	0.258902	1504	1243.25	0.291667
5849	BioCarta	IL 6 signaling pathway	51	-3.04	0.00458053	301.833	2.24	0	1661	981.417	-0.4	2.42333	0.0308959	412.5	2.66	0	269	340.75	2.54167
5845	BioCarta	Double Stranded RNA Induced Gene Expression	30	-3.04667	0.00458736	293.167	-1.62	0.00605901	1729.5	1011.33	-2.33333	0.566667	0.3334	1458.67	-2.39	0	381	919.833	-0.911667
4632	GO:0006281	DNA repair	356	-3.04667	0.0045987	293.5	3.08	0	1348	820.75	0.0166667	0.813333	0.280351	1267.33	-0.63	0.258902	1504	1385.67	0.0916667
5940	BioCarta	TNF/Stress Related Signaling	65	-3.04667	0.0046046	292.167	0.48	0.0338733	1845	1068.58	-1.28333	1.23333	0.190905	965.167	-1	0.180021	1275	1120.08	0.116667
5115	GO:0015629	actin cytoskeleton	458	-3.05	0.00461209	295.833	3.6	0	600	447.917	0.275	-3.23667	0.00725774	145.833	-1.62	0.0884888	755	450.417	-2.42833
6225	KEGG	Apoptosis	232	-3.04667	0.00462902	291.833	3.8	0	277	284.417	0.376667	1.06667	0.223667	1079.33	-1.25	0.12974	1118	1098.67	-0.0916667
3081	GO:0016706	oxidoreductase activity, acting on paired donors, with incorporation or reduction of molecular oxygen, 2-oxoglutarate as one donor, and incorporation of one atom each of oxygen into both donors	35	-3.03	0.00465165	304.167	-0.48	0.0338733	1845	1074.58	-1.755	1.18	0.200678	1006.83	0.63	0.252459	1550.5	1278.67	0.905
5097	GO:0003743	translation initiation factor activity	165	-3.03667	0.00465486	304.833	3.22	0	1217	760.917	0.0916667	-2.83	0.0146937	266	-2.22	0	469	367.5	-2.525
679	GO:0035004	phosphoinositide 3-kinase activity	27	-3.02667	0.00467119	314.333	-2.03	0	1689	1001.67	-2.52833	1.25333	0.188137	943.667	2.19	0	484	713.833	1.72167
1598	GO:0016303	phosphatidylinositol 3-kinase activity	27	-3.02667	0.00467119	314.333	-2.03	0	1689	1001.67	-2.52833	1.25333	0.188137	943.667	2.19	0	484	713.833	1.72167
5824	BioCarta	HIV-I Nef negative effector of Fas and TNF	135	-3.02333	0.00469185	308.667	3.59	0	617	462.833	0.283333	0.646667	0.316182	1394	-1.25	0.12974	1118	1256	-0.301667
2811	GO:0046961	hydrogen-transporting ATPase activity, rotational mechanism	74	-3.03667	0.00469462	300.167	-2.07	0	1684	992.083	-2.55333	3.13	0.00859572	168.5	1.62	0.0785329	951.5	560	2.375
3038	GO:0046933	hydrogen-transporting ATP synthase activity, rotational mechanism	74	-3.03667	0.00469462	300.167	-2.07	0	1684	992.083	-2.55333	3.13	0.00859572	168.5	1.62	0.0785329	951.5	560	2.375
1746	GO:0016469	proton-transporting two-sector ATPase complex	60	-3.02667	0.00469598	305.5	-2.66	0	1547	926.25	-2.84333	3.21667	0.00743865	142.833	1.96	0	558	350.417	2.58833
5786	GO:0015985	energy coupled proton transport, down electrochemical gradient	60	-3.02667	0.00469598	305.5	-2.66	0	1547	926.25	-2.84333	3.21667	0.00743865	142.833	1.96	0	558	350.417	2.58833
5788	GO:0015986	ATP synthesis coupled proton transport	60	-3.02667	0.00469598	305.5	-2.66	0	1547	926.25	-2.84333	3.21667	0.00743865	142.833	1.96	0	558	350.417	2.58833
4233	GO:0009147	pyrimidine nucleoside triphosphate metabolism	20	-3.03	0.00473436	302.167	-3.32	0	1096	699.083	-3.175	-0.613333	0.322876	1423.5	-1.62	0.0884888	755	1089.25	-1.11667
3924	GO:0009408	response to heat	48	-3.02667	0.00474064	305.333	-1.25	0.0116279	1788.5	1046.92	-2.13833	-0.876667	0.266732	1214.5	-1.62	0.0884888	755	984.75	-1.24833
3709	GO:0006325	establishment and/or maintenance of chromatin architecture	387	-3.03	0.00475605	326	3.6	0	599	462.5	0.285	-1.27667	0.183832	928.333	-2.48	0	345	636.667	-1.87833
46	GO:0015934	large ribosomal subunit	67	-3.02333	0.00476398	305.667	-2.29	0	1654	979.833	-2.65667	1.95333	0.0709367	600.5	0.48	0.289867	1608	1104.25	1.21667
4980	GO:0000287	magnesium ion binding	559	-3.02	0.00476672	310.833	3.52	0	757	533.917	0.25	2.69333	0.0188311	311.833	-0.34	0.32836	1669.5	990.667	1.17667
2863	GO:0016779	nucleotidyltransferase activity	204	-3.01667	0.00477615	310.833	3.05	0	1364	837.417	0.0166667	-3.27667	0.00668715	129.333	-2.83	0	203	166.167	-3.05333
1378	GO:0005952	cAMP-dependent protein kinase complex	32	-3.02667	0.00478842	304.333	-0.48	0.0338733	1845	1074.67	-1.75333	-0.573333	0.332543	1449.33	-3.52	0	56	752.667	-2.04667
2295	GO:0050876	reproductive physiological process	86	3.03333	0.00479775	300.167	3.46	0	860	580.083	3.24667	-0.22	0.411354	1715.5	-0.63	0.258902	1504	1609.75	-0.425
5762	GO:0048609	reproductive organismal physiological process	86	3.03333	0.00479775	300.167	3.46	0	860	580.083	3.24667	-0.22	0.411354	1715.5	-0.63	0.258902	1504	1609.75	-0.425
4447	GO:0006118	electron transport	531	-3.01	0.00484669	322.333	3.96	0	83	202.667	0.475	5.29	0	42.3333	1.62	0.0785329	951.5	496.917	3.455
5728	GO:0015992	proton transport	100	-2.99667	0.0049059	322.167	0.2	0.0445521	1873	1097.58	-1.39833	3.48	0.0046588	96.6667	2.05	0	536	316.333	2.765
5977	BioCarta	mTOR Signaling Pathway	77	-3	0.00491721	321	2.72	0	1530	925.5	-0.14	0.123333	0.431351	1799.67	-0.34	0.32836	1669.5	1734.58	-0.108333
2051	GO:0051017	actin filament bundle formation	24	3.00667	0.00491774	320.5	3.82	0	244	282.25	3.41333	-1.39	0.161425	861.333	-2.85	0	190	525.667	-2.12
5986	BioCarta	Inhibition of Cellular Proliferation by Gleevec	56	-3.01	0.00492407	313	1.75	0	1717	1015	-0.63	2.32	0.0371403	456.333	2.23	0	466	461.167	2.275
5063	GO:0003779	actin binding	517	-2.99333	0.00493692	323.333	3.53	0	747	535.167	0.268333	-1.68667	0.108598	711.333	-1.62	0.0884888	755	733.167	-1.65333
4154	GO:0000313	organellar ribosome	79	-2.99333	0.00494047	323.833	-0.07	0.0499036	1882	1102.92	-1.53167	1.64667	0.115453	730.667	0.48	0.289867	1608	1169.33	1.06333
5764	GO:0005761	mitochondrial ribosome	79	-2.99333	0.00494047	323.833	-0.07	0.0499036	1882	1102.92	-1.53167	1.64667	0.115453	730.667	0.48	0.289867	1608	1169.33	1.06333
5651	GO:0005242	inward rectifier potassium channel activity	28	2.99333	0.00494592	332.167	3.56	0	688	510.083	3.27667	-0.163333	0.422598	1768.17	0.07	0.378069	1871.5	1819.83	-0.0466667
1892	GO:0008286	insulin receptor signaling pathway	54	-2.98667	0.00497185	328.5	2.75	0	1524	926.25	-0.118333	1.71	0.105139	698.833	0.8	0.215565	1424	1061.42	1.255
6033	BioCarta	Insulin Signaling Pathway	54	-2.98667	0.00500504	329.5	2.33	0	1649	989.25	-0.328333	0.96	0.248396	1157.67	0.63	0.252459	1550.5	1354.08	0.795
1029	GO:0007050	cell cycle arrest	70	-2.98333	0.00504101	327.667	0.63	0.0284231	1836	1081.83	-1.17667	2.95667	0.0115015	222.333	2.1	0	516	369.167	2.52833
5971	BioCarta	AKT Signaling Pathway	65	-2.97667	0.00506407	337	1.62	0.00590046	1753.5	1045.25	-0.678333	1.43333	0.153736	833	1.62	0.0785329	951.5	892.25	1.52667
5220	GO:0043065	positive regulation of apoptosis	248	-2.98333	0.005067	329	3.95	0	91	210	0.483333	2.79	0.0154385	279.167	1	0.1745	1347.5	813.333	1.895
2968	GO:0046915	transition metal ion transporter activity	55	-2.98333	0.00507768	325.833	0.2	0.0445521	1873	1099.42	-1.39167	1.97333	0.0683711	593.5	0.8	0.215565	1424	1008.75	1.38667
5696	GO:0006644	phospholipid metabolism	179	-2.96667	0.00510582	341.167	3.53	0	735	538.083	0.281667	0.196667	0.417171	1736.67	-1.62	0.0884888	755	1245.83	-0.711667
5806	GO:0005789	endoplasmic reticulum membrane	113	-2.96667	0.00510738	341.667	1	0.0172414	1814	1077.83	-0.983333	2.83	0.0143508	265.167	1.92	0	569	417.083	2.375
50	GO:0005746	mitochondrial electron transport chain	52	-2.97667	0.00510898	333.333	0.34	0.0391918	1864.5	1098.92	-1.31833	2.99	0.0108294	210.667	2.36	0	394	302.333	2.675
3594	GO:0008603	cAMP-dependent protein kinase regulator activity	33	-2.98333	0.00511014	324.833	-0.2	0.0445521	1873	1098.92	-1.59167	-0.723333	0.299806	1334.67	-3.5	0	59	696.833	-2.11167
3283	GO:0016866	intramolecular transferase activity	31	-2.97333	0.00511083	339.5	-0.34	0.0393066	1856	1097.75	-1.65667	-1.34	0.172202	887.667	-3.57	0	46	466.833	-2.455
5227	GO:0043068	positive regulation of programmed cell death	252	-2.97667	0.00511882	330.667	3.98	0	77	203.833	0.501667	2.86667	0.0135863	252.833	1	0.1745	1347.5	800.167	1.93333
2821	GO:0016780	phosphotransferase activity, for other substituted phosphate groups	23	-2.97667	0.00515278	329.333	-2.58	0	1574	951.667	-2.77833	2.35333	0.0353539	442.333	2.99	0	156	299.167	2.67167
2439	GO:0007498	mesoderm development	64	-2.98	0.00517253	354.833	-0.2	0.0445521	1873	1113.92	-1.59	2.65333	0.0205306	319.667	2.16	0	499	409.333	2.40667
5795	GO:0005759	mitochondrial matrix	104	-2.95333	0.00517634	350.167	2.17	0	1674	1012.08	-0.391667	1.6	0.12235	750.333	0.2	0.35093	1770.5	1260.42	0.9
3601	GO:0016567	protein ubiquitination	431	-2.96667	0.00518166	338.333	3.43	0	912	625.167	0.231667	1.81333	0.0898094	655	-1.25	0.12974	1118	886.5	0.281667
2214	GO:0008757	S-adenosylmethionine-dependent methyltransferase activity	162	-2.97	0.00519144	338.333	3.89	0	162	250.167	0.46	-1.02333	0.234776	1106.5	-2.3	0	427	766.75	-1.66167
3550	GO:0008639	small protein conjugating enzyme activity	104	-2.96667	0.00519691	337.833	2.7	0	1537	937.417	-0.133333	0.146667	0.427138	1783	-1.62	0.0884888	755	1269	-0.736667
5461	GO:0005102	receptor binding	764	2.95667	0.00520447	348.833	3.91	0	125	236.917	3.43333	1.36	0.167574	878	0.2	0.35093	1770.5	1324.25	0.78
1648	GO:0042175	nuclear envelope-endoplasmic reticulum network	120	-2.95	0.00521192	349.833	2.2	0	1666	1007.92	-0.375	2.87667	0.0130301	250.833	1.78	0	602	426.417	2.32833
2935	GO:0007189	G-protein signaling, adenylate cyclase activating pathway	61	2.97333	0.00521311	334.833	3.32	0	1095	714.917	3.14667	-0.79	0.285536	1284	-1	0.180021	1275	1279.5	-0.895
4879	GO:0006752	group transfer coenzyme metabolism	97	-2.95667	0.00521414	348.833	2.69	0	1542	945.417	-0.133333	2.83667	0.0140306	262.833	0.63	0.252459	1550.5	906.667	1.73333
5921	BioCarta	Induction of apoptosis through DR3 and DR4/5 Death Receptors	71	-2.95667	0.00521484	346.5	1.25	0.0116279	1788.5	1067.5	-0.853333	0.0166667	0.453088	1876.33	-2.11	0	511	1193.67	-1.04667
1674	GO:0016493	C-C chemokine receptor activity	35	2.97	0.00523772	335.667	3.37	0	1020	677.833	3.17	-0.873333	0.267977	1217	-0.8	0.215565	1424	1320.5	-0.836667
4702	GO:0019957	C-C chemokine binding	35	2.97	0.00523772	335.667	3.37	0	1020	677.833	3.17	-0.873333	0.267977	1217	-0.8	0.215565	1424	1320.5	-0.836667
3729	GO:0009451	RNA modification	98	-2.96333	0.00524061	337.833	2.55	0	1591	964.417	-0.206667	-2.98667	0.011029	211.833	-2.8	0	210	210.917	-2.89333
5890	BioCarta	Cytokine Network	21	2.96333	0.00524743	345	3.55	0	703	524	3.25667	0.116667	0.432512	1804.5	1.25	0.12974	1118	1461.25	0.683333
3266	GO:0031300	intrinsic to organelle membrane	33	-2.94333	0.00524945	354.167	-0.48	0.0338733	1845	1099.58	-1.71167	3	0.0106751	210.833	3.02	0	146	178.417	3.01
3269	GO:0031301	integral to organelle membrane	33	-2.94333	0.00524945	354.167	-0.48	0.0338733	1845	1099.58	-1.71167	3	0.0106751	210.833	3.02	0	146	178.417	3.01
6111	KEGG	Fatty_acid_metabolism	75	-2.94333	0.00524945	354.167	0.34	0.0391918	1864.5	1109.33	-1.30167	10.9433	0	4	3.68	0	27	15.5	7.31167
389	GO:0005520	insulin-like growth factor binding	44	-2.95333	0.00526203	350.167	1.62	0.00590046	1753.5	1051.83	-0.666667	2.39667	0.0323147	425.333	2.9	0	178	301.667	2.64833
6055	BioCarta	Signaling of Hepatocyte Growth Factor Receptor	104	-2.96	0.00527156	339.5	3	0	1394	866.75	0.02	-0.903333	0.260526	1197.67	-2.28	0	438	817.833	-1.59167
5827	BioCarta	TNFR1 Signaling Pathway	69	-2.93667	0.00528834	359.333	2	0	1690	1024.67	-0.468333	1.60333	0.123025	751.333	0.07	0.378069	1871.5	1311.42	0.836667
4328	GO:0009108	coenzyme biosynthesis	144	-2.95333	0.00528859	346.5	3.37	0	1010	678.25	0.208333	2.24667	0.0427788	481.167	-0.34	0.32836	1669.5	1075.33	0.953333
4058	GO:0006418	tRNA aminoacylation for protein translation	80	-2.96	0.0052911	339.5	1.25	0.0116279	1788.5	1064	-0.855	-2.94333	0.0115778	230.333	-2.77	0	221	225.667	-2.85667
5306	GO:0043038	amino acid activation	80	-2.96	0.0052911	339.5	1.25	0.0116279	1788.5	1064	-0.855	-2.94333	0.0115778	230.333	-2.77	0	221	225.667	-2.85667
5308	GO:0043039	tRNA aminoacylation	80	-2.96	0.0052911	339.5	1.25	0.0116279	1788.5	1064	-0.855	-2.94333	0.0115778	230.333	-2.77	0	221	225.667	-2.85667
4318	GO:0048193	Golgi vesicle transport	78	-2.95667	0.00531102	343.167	1.62	0.00590046	1753.5	1048.33	-0.668333	2.36	0.0347449	441	1.62	0.0785329	951.5	696.25	1.99
4376	GO:0004840	ubiquitin conjugating enzyme activity	102	-2.94667	0.00533528	350.167	2.68	0	1543	946.583	-0.133333	0.116667	0.431982	1807.33	-1.62	0.0884888	755	1281.17	-0.751667
6018	BioCarta	Regulation of eIF4e and p70 S6 Kinase	66	-2.94333	0.00533935	353.167	2.88	0	1471	912.083	-0.0316667	-0.84	0.275051	1242.17	-1.62	0.0884888	755	998.583	-1.23
4181	GO:0006400	tRNA modification	86	-2.95333	0.00536174	347.833	1.62	0.00590046	1753.5	1050.67	-0.666667	-3.10667	0.00899332	175	-2.83	0	199	187	-2.96833
6051	BioCarta	Angiotensin II mediated activation of JNK Pathway via Pyk2 dependent signaling	93	-2.94667	0.00540234	349	3.58	0	647	498	0.316667	0.29	0.397486	1667.67	-1.25	0.12974	1118	1392.83	-0.48
3289	GO:0016868	intramolecular transferase activity, phosphotransferases	21	-2.93	0.00540481	361.833	-2.81	0	1500	930.917	-2.87	-2.29333	0.0393038	466.167	-3.86	0	15	240.583	-3.07667
2015	GO:0051020	GTPase binding	129	2.94667	0.00540803	350.5	3.45	0	875	612.75	3.19833	-0.926667	0.254386	1184.33	-1.62	0.0884888	755	969.667	-1.27333
660	GO:0030384	phosphoinositide metabolism	72	-2.95	0.00544241	351.333	1.62	0.00590046	1753.5	1052.42	-0.665	2.22333	0.0445792	489.333	1.25	0.12974	1118	803.667	1.73667
1086	GO:0008452	RNA ligase activity	102	-2.93	0.00545005	358.833	1.62	0.00590046	1753.5	1056.17	-0.655	-3.02	0.0102551	204.667	-2.71	0	248	226.333	-2.865
3346	GO:0016875	ligase activity, forming carbon-oxygen bonds	102	-2.93	0.00545005	358.833	1.62	0.00590046	1753.5	1056.17	-0.655	-3.02	0.0102551	204.667	-2.71	0	248	226.333	-2.865
3348	GO:0016876	ligase activity, forming aminoacyl-tRNA and related compounds	102	-2.93	0.00545005	358.833	1.62	0.00590046	1753.5	1056.17	-0.655	-3.02	0.0102551	204.667	-2.71	0	248	226.333	-2.865
4353	GO:0004812	tRNA ligase activity	102	-2.93	0.00545005	358.833	1.62	0.00590046	1753.5	1056.17	-0.655	-3.02	0.0102551	204.667	-2.71	0	248	226.333	-2.865
5917	BioCarta	p38 MAPK Signaling Pathway	88	-2.92333	0.0054515	365.5	2.57	0	1582	973.75	-0.176667	0.756667	0.291696	1312	-1.62	0.0884888	755	1033.5	-0.431667
404	GO:0006986	response to unfolded protein	107	-2.93	0.00548122	358.333	0.8	0.0229084	1825	1091.67	-1.065	-0.55	0.335805	1477.17	-2.47	0	352	914.583	-1.51
6164	KEGG	GlycosylphosphatidylinositolGPI-anchor_biosynthesis	48	-2.92	0.00551645	367	0.63	0.0284231	1836	1101.5	-1.145	1.25333	0.188514	945.5	0.34	0.321109	1713.5	1329.5	0.796667
2925	GO:0007187	G-protein signaling, coupled to cyclic nucleotide second messenger	80	2.92667	0.00553515	364	3.43	0	911	637.5	3.17833	-0.0133333	0.453414	1877	-0.07	0.385304	1831.5	1854.25	-0.0416667
3325	GO:0016886	ligase activity, forming phosphoric ester bonds	113	-2.91667	0.00554734	366.833	2.05	0	1686	1026.42	-0.433333	-3.17333	0.00835554	151	-2.87	0	185	168	-3.02167
3031	GO:0019887	protein kinase regulator activity	134	-2.92	0.00555276	366.833	2.12	0	1676	1021.42	-0.4	1.16333	0.203176	1020	-1.25	0.12974	1118	1069	-0.0433333
1297	GO:0001841	neural tube formation	37	-2.92333	0.00555341	364.333	0.48	0.0338733	1845	1104.67	-1.22167	-0.49	0.346859	1530	-3.54	0	53	791.5	-2.015
3782	GO:0051188	cofactor biosynthesis	166	-2.91333	0.00555354	373	3.68	0	459	416	0.383333	2.59333	0.0229345	343.333	0.48	0.289867	1608	975.667	1.53667
35	GO:0030055	cell-matrix junction	75	-2.91	0.00555636	373.167	2.89	0	1467	920.083	-0.01	-3.40333	0.00513288	109	-3	0	152	130.5	-3.20167
1721	GO:0015082	di-, tri-valent inorganic cation transporter activity	71	-2.91	0.0055693	372.167	1.62	0.00590046	1753.5	1062.83	-0.645	1.52333	0.135872	791.5	-0.07	0.385304	1831.5	1311.5	0.726667
5055	GO:0006892	post-Golgi transport	20	-2.91	0.00557097	372.167	-1.76	0	1714	1043.08	-2.335	2.78667	0.0156363	279.667	3.16	0	115	197.333	2.97333
2930	GO:0007188	G-protein signaling, coupled to cAMP nucleotide second messenger	74	2.92333	0.00557757	364.167	3.32	0	1103	733.583	3.12167	-0.19	0.417884	1742.5	-0.34	0.32836	1669.5	1706	-0.265
3226	GO:0051348	negative regulation of transferase activity	66	-2.91333	0.00558138	370.167	1.62	0.00590046	1753.5	1061.83	-0.646667	1.53	0.134484	790.333	-0.8	0.215565	1424	1107.17	0.365
3925	GO:0006469	negative regulation of protein kinase activity	66	-2.91333	0.00558138	370.167	1.62	0.00590046	1753.5	1061.83	-0.646667	1.53	0.134484	790.333	-0.8	0.215565	1424	1107.17	0.365
5238	GO:0043086	negative regulation of enzyme activity	67	-2.91333	0.00558138	370.167	1.63	0.00608788	1726	1048.08	-0.641667	1.57333	0.127136	767	-0.8	0.215565	1424	1095.5	0.386667
2424	GO:0019207	kinase regulator activity	139	-2.91333	0.00559718	370.833	2.12	0	1677	1023.92	-0.396667	1.51333	0.138134	795.167	-0.48	0.289867	1608	1201.58	0.516667
6273	mousepaths	Tumor Metastasis	220	-2.90333	0.00560074	376.333	3.48	0	830	603.167	0.288333	-3.33667	0.00576829	127	-1.62	0.0884888	755	441	-2.47833
2893	GO:0004434	inositol or phosphatidylinositol phosphodiesterase activity	24	-2.90667	0.00560992	374.167	-0.48	0.0338733	1845	1109.58	-1.69333	0.186667	0.418733	1745.83	0.2	0.35093	1770.5	1758.17	0.193333
2896	GO:0004435	phosphoinositide phospholipase C activity	24	-2.90667	0.00560992	374.167	-0.48	0.0338733	1845	1109.58	-1.69333	0.186667	0.418733	1745.83	0.2	0.35093	1770.5	1758.17	0.193333
3451	GO:0015405	P-P-bond-hydrolysis-driven transporter activity	215	-2.91	0.00561849	375.333	4.07	0	32	203.667	0.58	3.19667	0.00732046	155.333	0.63	0.252459	1550.5	852.917	1.91333
1922	GO:0008276	protein methyltransferase activity	65	-2.94333	0.00562399	350.833	3.05	0	1368	859.417	0.0533333	1.03	0.232886	1101.5	-1.92	0	568	834.75	-0.445
3098	GO:0019829	cation-transporting ATPase activity	105	-2.92	0.00564103	366.667	1.83	0	1709	1037.83	-0.545	2.80667	0.015036	272	0.8	0.215565	1424	848	1.80333
148	GO:0046467	membrane lipid biosynthesis	129	-2.89667	0.00564524	380.167	3.16	0	1284	832.083	0.131667	-1.88333	0.0800645	624.167	-2.46	0	356	490.083	-2.17167
5041	GO:0005496	steroid binding	99	2.9	0.00565495	383.667	3.84	0	226	304.833	3.37	0.156667	0.424333	1774	-0.07	0.385304	1831.5	1802.75	0.0433333
4457	GO:0009266	response to temperature	55	-2.89667	0.00568787	384.833	0.07	0.0498315	1887	1135.92	-1.41333	-0.76	0.29184	1309.17	-1.62	0.0884888	755	1032.08	-1.19
2997	GO:0050662	coenzyme binding	79	-2.92333	0.00569621	363.167	1.62	0.00590046	1753.5	1058.33	-0.651667	-4.64667	0.000623352	55.8333	-3.83	0	17	36.4167	-4.23833
2905	GO:0016712	oxidoreductase activity, acting on paired donors, with incorporation or reduction of molecular oxygen, reduced flavin or flavoprotein as one donor, and incorporation of one atom of oxygen	36	2.91667	0.00570451	367.333	3.89	0	154	260.667	3.40333	2.36	0.0347685	441.667	4.08	0	7	224.333	3.22
2428	GO:0045859	regulation of protein kinase activity	158	-2.9	0.00570524	383.667	3.81	0	260	321.833	0.455	-1.17333	0.201502	1013	-2.18	0	492	752.5	-1.67667
3262	GO:0051338	regulation of transferase activity	158	-2.9	0.00570524	383.667	3.81	0	260	321.833	0.455	-1.17333	0.201502	1013	-2.18	0	492	752.5	-1.67667
6285	mousepaths	TGF BMP Signaling Pathway	216	-2.90333	0.00570859	381.667	4.2	0	8	194.833	0.648333	2.73333	0.0171466	298.667	0.48	0.289867	1608	953.333	1.60667
6248	KEGG	Alzheimers_disease	70	-2.89667	0.00570937	385.667	2.76	0	1519	952.333	-0.0683333	1.12333	0.211846	1043.17	-0.07	0.385304	1831.5	1437.33	0.526667
5914	BioCarta	Control of Gene Expression by Vitamin D Receptor	76	-2.90333	0.00572099	374.833	3.33	0	1089	731.917	0.213333	2.44333	0.0301209	403.333	0.8	0.215565	1424	913.667	1.62167
6146	KEGG	Selenoamino_acid_metabolism	52	-2.9	0.00572326	380.333	-0.07	0.0499036	1882	1131.17	-1.485	-1.64333	0.115801	730.333	-2.32	0	415	572.667	-1.98167
1831	GO:0050793	regulation of development	450	-2.89667	0.00572986	380.667	4.07	0	30	205.333	0.586667	0.44	0.359515	1563.33	-1.25	0.12974	1118	1340.67	-0.405
2878	GO:0007167	enzyme linked receptor protein signaling pathway	467	-2.89333	0.00575584	386.5	3.62	0	572	479.25	0.363333	3.18667	0.00770284	159.833	0.63	0.252459	1550.5	855.167	1.90833
5825	BioCarta	FAS signaling pathway ( CD95 )	72	-2.89	0.00577547	389.667	1.64	0.0060911	1725	1057.33	-0.625	1.10667	0.215929	1051	-0.8	0.215565	1424	1237.5	0.153333
5595	GO:0006650	glycerophospholipid metabolism	104	-2.89667	0.00578221	379.833	1.9	0	1705	1042.42	-0.498333	1.76	0.0971645	677.667	-0.07	0.385304	1831.5	1254.58	0.845
1472	GO:0005924	cell-substrate adherens junction	62	-2.88333	0.00578528	391.5	2.43	0	1623	1007.25	-0.226667	-2.78	0.0159301	284.5	-2.83	0	202	243.25	-2.805
3368	GO:0007266	Rho protein signal transduction	70	-2.88667	0.0058144	389.167	3.16	0	1280	834.583	0.136667	1.32667	0.174502	896.333	-0.63	0.258902	1504	1200.17	0.348333
4697	GO:0019955	cytokine binding	123	2.89667	0.00584982	382.667	4.04	0	44	213.333	3.46833	0.123333	0.431491	1798.5	-0.8	0.215565	1424	1611.25	-0.338333
6019	BioCarta	Skeletal muscle hypertrophy is regulated via AKT/mTOR pathway	72	-2.88333	0.00587201	388.833	3.2	0	1243	815.917	0.158333	0.853333	0.272404	1228.17	0.2	0.35093	1770.5	1499.33	0.526667
6010	BioCarta	Toll-Like Receptor Pathway	89	-2.87333	0.00591898	397.5	2.95	0	1429	913.25	0.0383333	1.20667	0.194832	987.667	-1	0.180021	1275	1131.33	0.103333
1474	GO:0005925	focal adhesion	61	-2.86667	0.00591997	402.833	2.48	0	1615	1008.92	-0.193333	-2.82333	0.0144949	269.167	-2.82	0	205	237.083	-2.82167
451	GO:0006914	autophagy	41	-2.88	0.00592152	394.833	1	0.0172414	1814	1104.42	-0.94	1.84	0.0862191	645	0.07	0.378069	1871.5	1258.25	0.955
4073	GO:0009165	nucleotide biosynthesis	211	-2.87	0.00597401	399.333	3.25	0	1185	792.167	0.19	1.79667	0.0922502	663.5	0.63	0.252459	1550.5	1107	1.21333
6249	KEGG	Parkinsons_disease	36	-2.85667	0.0060025	410.667	2.58	0	1576	993.333	-0.138333	-0.486667	0.34835	1531.33	-1.25	0.12974	1118	1324.67	-0.868333
2715	GO:0016791	phosphoric monoester hydrolase activity	479	-2.85667	0.00602176	410	3.39	0	980	695	0.266667	0.28	0.398135	1674.83	-1.25	0.12974	1118	1396.42	-0.485
1114	GO:0030176	integral to endoplasmic reticulum membrane	21	-2.85333	0.00604816	414	-0.63	0.0285501	1830.5	1122.25	-1.74167	2.68667	0.019191	314.667	2.72	0	246	280.333	2.70333
4164	GO:0031227	intrinsic to endoplasmic reticulum membrane	21	-2.85333	0.00604816	414	-0.63	0.0285501	1830.5	1122.25	-1.74167	2.68667	0.019191	314.667	2.72	0	246	280.333	2.70333
251	GO:0005843	cytosolic small ribosomal subunit (sensu Eukaryota)	48	-2.86	0.00605873	405.167	1.82	0	1710	1057.58	-0.52	2.43	0.0307816	406.333	2.61	0	284	345.167	2.52
2469	GO:0016283	eukaryotic 48S initiation complex	48	-2.86	0.00605873	405.167	1.82	0	1710	1057.58	-0.52	2.43	0.0307816	406.333	2.61	0	284	345.167	2.52
5186	GO:0006818	hydrogen transport	126	-2.86	0.00606795	406.333	2.5	0	1609	1007.67	-0.18	4.08667	0.00255749	70.3333	1.71	0	612	341.167	2.89833
6159	KEGG	Chondroitin__Heparan_sulfate_biosynthesis	72	-2.85667	0.00608154	406.333	1.25	0.0116279	1788.5	1097.42	-0.803333	-1.48	0.144736	809.667	-2.08	0	526	667.833	-1.78
6284	mousepaths	Breast Cancer _ Estrogen Receptor Signaling	225	-2.86667	0.00610926	399.333	3.43	0	916	657.667	0.281667	0.423333	0.363772	1578.33	-1	0.180021	1275	1426.67	-0.288333
5772	GO:0005768	endosome	148	-2.85333	0.00612337	407	3.27	0	1163	785	0.208333	2.89	0.0127392	247.667	1.62	0.0785329	951.5	599.583	2.255
2822	GO:0004428	inositol or phosphatidylinositol kinase activity	79	-2.85667	0.00614427	403.333	1.95	0	1698	1050.67	-0.453333	0.616667	0.322309	1418.33	-0.07	0.385304	1831.5	1624.92	0.273333
175	GO:0005882	intermediate filament	127	2.85667	0.00615805	406.833	3.14	0	1302	854.417	2.99833	-2.95667	0.0113922	224	-2.43	0	369	296.5	-2.69333
601	GO:0016072	rRNA metabolism	70	-2.86333	0.00616199	397.333	1.78	0	1711	1054.17	-0.541667	-5.44	0	39	-3.26	0	98	68.5	-4.35
3623	GO:0006364	rRNA processing	70	-2.86333	0.00616199	397.333	1.78	0	1711	1054.17	-0.541667	-5.44	0	39	-3.26	0	98	68.5	-4.35
3299	GO:0004177	aminopeptidase activity	95	-2.84333	0.00617028	416.833	2.4	0	1633	1024.92	-0.221667	-0.173333	0.422305	1758.67	-1.62	0.0884888	755	1256.83	-0.896667
2152	GO:0007369	gastrulation	88	-2.83333	0.00630619	424	1	0.0172414	1814	1119	-0.916667	1.30667	0.178532	909.833	-0.34	0.32836	1669.5	1289.67	0.483333
1185	GO:0007033	vacuole organization and biogenesis	27	-2.83333	0.00632149	420	-0.2	0.0445521	1873	1146.5	-1.51667	0.856667	0.271389	1225.83	-1.25	0.12974	1118	1171.92	-0.196667
4670	GO:0000165	MAPKKK cascade	199	-2.84	0.00635549	411.667	4.25	0	5	208.333	0.705	-0.986667	0.242584	1136.67	-1.62	0.0884888	755	945.833	-1.30333
5240	GO:0006807	nitrogen compound metabolism	559	-2.84	0.00635874	414.333	3.73	0	377	395.667	0.445	-1.97333	0.0682574	594	-1.25	0.12974	1118	856	-1.61167
6217	KEGG	Proteasome	73	-2.83333	0.00636318	419.5	2.71	0	1535	977.25	-0.0616667	1.42333	0.154829	838.333	-1.25	0.12974	1118	978.167	0.0866667
2692	GO:0048037	cofactor binding	97	-2.84667	0.00637002	410.833	2.73	0	1528	969.417	-0.0583333	-3.37333	0.00538879	115.333	-3.66	0	30	72.6667	-3.51667
6131	KEGG	Lysine_degradation	123	-2.83	0.00643542	422.667	3.57	0	667	544.833	0.37	3.05333	0.00996045	189.833	2.38	0	384	286.917	2.71667
1172	GO:0030117	membrane coat	91	-2.82667	0.00644453	423	3.92	0	112	267.5	0.546667	2.42333	0.0309913	410	0.2	0.35093	1770.5	1090.25	1.31167
4071	GO:0048475	coated membrane	91	-2.82667	0.00644453	423	3.92	0	112	267.5	0.546667	2.42333	0.0309913	410	0.2	0.35093	1770.5	1090.25	1.31167
3425	GO:0007270	nerve-nerve synaptic transmission	45	2.83	0.00645801	421.833	3.8	0	270	345.917	3.315	0.0566667	0.445622	1848.67	0.2	0.35093	1770.5	1809.58	0.128333
1918	GO:0031072	heat shock protein binding	87	-2.82	0.00646387	431.333	2.61	0	1563	997.167	-0.105	0.596667	0.325663	1431	-2.26	0	452	941.5	-0.831667
1439	GO:0045111	intermediate filament cytoskeleton	128	2.82667	0.00649391	425.333	3.13	0	1306	865.667	2.97833	-2.94333	0.0116465	228.167	-2.43	0	368	298.083	-2.68667
6211	KEGG	Neurodegenerative_Disorders	97	-2.83	0.00650864	419.5	3.07	0	1351	885.25	0.12	0.676667	0.309887	1370.83	-1	0.180021	1275	1322.92	-0.161667
3187	GO:0019838	growth factor binding	103	-2.82333	0.00656103	422.333	2.51	0	1603	1012.67	-0.156667	2.92333	0.012222	234.167	2.17	0	494	364.083	2.54667
5839	BioCarta	Apoptotic Signaling in Response to DNA Damage	74	-2.81333	0.00658996	434.167	3.69	0	439	436.583	0.438333	-0.476667	0.352209	1538.67	-2.46	0	358	948.333	-1.46833
4849	GO:0019904	protein domain specific binding	81	-2.80667	0.00662524	438.333	3.58	0	645	541.667	0.386667	-1.88333	0.0796164	625.667	-2.47	0	353	489.333	-2.17667
6128	KEGG	Valine,_leucine_and_isoleucine_degradation	99	-2.81667	0.00666219	427.833	2.6	0	1567	997.417	-0.108333	10.1267	0	8	3.71	0	25	16.5	6.91833
4045	GO:0006413	translational initiation	109	-2.81	0.00666669	434	3.15	0	1291	862.5	0.17	-2.83	0.0146574	263.667	-2.24	0	464	363.833	-2.535
1937	GO:0001654	eye development	120	2.80667	0.00666834	438.167	3.85	0	199	318.583	3.32833	1.99667	0.0656278	585.167	1.62	0.0785329	951.5	768.333	1.80833
1343	GO:0001839	neural plate morphogenesis	38	-2.81667	0.00667575	428.833	1.25	0.0116279	1788.5	1108.67	-0.783333	-0.523333	0.340671	1505.17	-3.51	0	58	781.583	-2.01667
3421	GO:0045637	regulation of myeloid cell differentiation	53	-2.80667	0.00668654	440	1.62	0.00590046	1753.5	1096.75	-0.593333	-0.843333	0.274513	1235.67	-0.63	0.258902	1504	1369.83	-0.736667
1130	GO:0030120	vesicle coat	83	-2.80333	0.0067341	439.5	4.19	0	11	225.25	0.693333	2.36667	0.0344023	435.667	0.2	0.35093	1770.5	1103.08	1.28333
1609	GO:0042158	lipoprotein biosynthesis	99	-2.80333	0.0067341	439.5	1.99	0	1692	1065.75	-0.406667	2.28	0.0400955	471	1.62	0.0785329	951.5	711.25	1.95
481	GO:0005504	fatty acid binding	20	-2.8	0.00676172	442.833	-2.93	0	1452	947.417	-2.865	1.71333	0.104843	696.833	1	0.1745	1347.5	1022.17	1.35667
5948	BioCarta	Keratinocyte Differentiation	107	-2.8	0.0068138	440.5	3.33	0	1090	765.25	0.265	2.61333	0.0220674	333.5	1.62	0.0785329	951.5	642.5	2.11667
2322	GO:0045892	negative regulation of transcription, DNA-dependent	257	-2.80333	0.00682991	433.167	3.61	0	589	511.083	0.403333	0.666667	0.311793	1375.5	-1.62	0.0884888	755	1065.25	-0.476667
6256	mousepaths	Stress _ Toxicity PathwayFinder	193	-2.79667	0.0068398	440.167	2.98	0	1416	928.083	0.0916667	2.10333	0.055261	538.667	0.8	0.215565	1424	981.333	1.45167
1340	GO:0001838	embryonic epithelial tube formation	39	-2.81	0.006867	430.333	1.25	0.0116279	1788.5	1109.42	-0.78	-0.55	0.335174	1472.83	-3.47	0	61	766.917	-2.01
3844	GO:0006497	protein lipidation	96	-2.79333	0.00689563	448.5	1.61	0.00589744	1775	1111.75	-0.591667	1.62	0.118988	742	1	0.1745	1347.5	1044.75	1.31
4156	GO:0000314	organellar small ribosomal subunit	20	-2.78667	0.00691873	445.667	-0.07	0.0499036	1882	1163.83	-1.42833	2.01333	0.0640765	578	2.6	0	288	433	2.30667
5768	GO:0005763	mitochondrial small ribosomal subunit	20	-2.78667	0.00691873	445.667	-0.07	0.0499036	1882	1163.83	-1.42833	2.01333	0.0640765	578	2.6	0	288	433	2.30667
6016	BioCarta	Fc Epsilon Receptor I Signaling in Mast Cells	89	-2.79	0.00694803	446	3.55	0	691	568.5	0.38	-1.56667	0.128241	769.167	-2.4	0	379	574.083	-1.98333
1415	GO:0008194	UDP-glycosyltransferase activity	181	-2.78667	0.0069483	450	3.21	0	1227	838.5	0.211667	0.436667	0.360258	1566.67	-1.62	0.0884888	755	1160.83	-0.591667
5949	BioCarta	NFkB activation by Nontypeable Hemophilus influenzae	66	-2.78667	0.00696382	449.5	2.8	0	1502	975.75	0.00666667	2.44333	0.0299014	403.167	0.2	0.35093	1770.5	1086.83	1.32167
3159	GO:0042579	microbody	124	-2.80333	0.00696597	432.5	4.04	0	45	238.75	0.618333	5.12	0.0014287	49.5	3.05	0	138	93.75	4.085
5822	GO:0005777	peroxisome	124	-2.80333	0.00696597	432.5	4.04	0	45	238.75	0.618333	5.12	0.0014287	49.5	3.05	0	138	93.75	4.085
5836	BioCarta	ATM Signaling Pathway	55	-2.78667	0.00697644	447	1.94	0	1700	1073.5	-0.423333	0.93	0.253973	1183.5	-0.63	0.258902	1504	1343.75	0.15
3497	GO:0031410	cytoplasmic vesicle	398	-2.78333	0.00699866	451.667	3.85	0	209	330.333	0.533333	2.72	0.0178862	302.167	-0.07	0.385304	1831.5	1066.83	1.325
6132	KEGG	Arginine_and_proline_metabolism	71	-2.78333	0.00702275	453.167	0.63	0.0284231	1836	1144.58	-1.07667	1.05333	0.227843	1089	1.62	0.0785329	951.5	1020.25	1.33667
5774	GO:0000502	proteasome complex (sensu Eukaryota)	65	-2.77667	0.00710297	452.5	3.07	0	1353	902.75	0.146667	1.24667	0.189011	947.167	-1.25	0.12974	1118	1032.58	-0.00166667
58	GO:0005730	nucleolus	185	-2.78	0.00714047	450.833	2.84	0	1488	969.417	0.03	-3.24667	0.00691946	140.833	-2.48	0	347	243.917	-2.86333
5208	GO:0003899	DNA-directed RNA polymerase activity	71	-2.77333	0.00714726	456	2.48	0	1614	1035	-0.146667	-3.62333	0.00298492	82.6667	-3.05	0	136	109.333	-3.33667
2857	GO:0016776	phosphotransferase activity, phosphate group as acceptor	58	-2.77	0.00718258	454.333	2.56	0	1589	1021.67	-0.105	-0.826667	0.277631	1250.67	-1	0.180021	1275	1262.83	-0.913333
6287	mousepaths	Nitric Oxide	209	-2.76333	0.00725349	463.667	3.56	0	680	571.833	0.398333	-4.44	0.000636574	58.1667	-3.19	0	108	83.0833	-3.815
4647	GO:0009792	embryonic development (sensu Metazoa)	301	-2.76667	0.00726967	458.667	3.28	0	1155	806.833	0.256667	-0.446667	0.358882	1557.33	-1.62	0.0884888	755	1156.17	-1.03333
6160	KEGG	Keratan_sulfate_biosynthesis	35	-2.76667	0.00727416	458.167	1	0.0172414	1814	1136.08	-0.883333	0.423333	0.364105	1577	-0.8	0.215565	1424	1500.5	-0.188333
5155	GO:0006821	chloride transport	117	2.75667	0.00740695	463.5	3.38	0	997	730.25	3.06833	-0.846667	0.274325	1235.83	-1.25	0.12974	1118	1176.92	-1.04833
1798	GO:0042101	T cell receptor complex	22	2.76	0.00743289	459	3.62	0	567	513	3.19	-4.97	0.00125993	59.6667	-3.14	0	119	89.3333	-4.055
6258	mousepaths	Apoptosis	209	-2.75333	0.00744274	465.167	3.65	0	520	492.583	0.448333	-0.38	0.375555	1603	-1.62	0.0884888	755	1179	-1
2564	GO:0030551	cyclic nucleotide binding	43	-2.75333	0.00745001	464.333	-2.2	0	1665	1064.67	-2.47667	-0.0866667	0.43896	1829.17	-3.37	0	84	956.583	-1.72833
3790	GO:0048332	mesoderm morphogenesis	29	-2.75667	0.00745137	464.333	-1.25	0.0116279	1788.5	1126.42	-2.00333	2.58667	0.0233254	341.833	2.9	0	174	257.917	2.74333
6145	KEGG	Aminophosphonate_metabolism	47	-2.75667	0.00747276	464.667	1.62	0.00590046	1753.5	1109.08	-0.568333	-1.81667	0.0890055	653.667	-3.01	0	147	400.333	-2.41333
2154	GO:0016125	sterol metabolism	121	-2.75333	0.00749874	463	2.42	0	1628	1045.5	-0.166667	3.03333	0.0101652	199.5	2.56	0	312	255.75	2.79667
5239	GO:0043087	regulation of GTPase activity	61	-2.75	0.00751128	466.833	1.25	0.0116279	1788.5	1127.67	-0.75	-0.983333	0.24297	1140.5	-1.98	0	551	845.75	-1.48167
5656	GO:0005245	voltage-gated calcium channel activity	47	2.75	0.00752926	468.5	3.66	0	493	480.75	3.205	-0.593333	0.327396	1436.17	-1.25	0.12974	1118	1277.08	-0.921667
1624	GO:0005905	coated pit	104	-2.75	0.00755443	469.667	3.85	0	206	337.833	0.55	-1.26333	0.186385	939.667	-1.62	0.0884888	755	847.333	-1.44167
5755	GO:0003682	chromatin binding	170	-2.75	0.00755913	467.833	3.46	0	867	667.417	0.355	0.463333	0.355134	1548.67	-0.8	0.215565	1424	1486.33	-0.168333
1762	GO:0015020	glucuronosyltransferase activity	28	-2.74333	0.0075737	471.333	2.63	0	1556	1013.67	-0.0566667	0.09	0.437004	1826.17	-1.25	0.12974	1118	1472.08	-0.58
6251	KEGG	Huntingtons_disease	88	-2.74	0.00762613	472.833	3.46	0	856	664.417	0.36	-0.283333	0.398271	1669.67	-2.53	0	322	995.833	-1.40667
2106	GO:0045786	negative regulation of progression through cell cycle	183	-2.74333	0.00763188	467.667	3.89	0	145	306.333	0.573333	3.02333	0.0105387	198.167	1.62	0.0785329	951.5	574.833	2.32167
5828	BioCarta	Growth Hormone Signaling Pathway	56	-2.74333	0.00765726	467.667	2.28	0	1657	1062.33	-0.231667	1.92	0.0757188	610.833	1.62	0.0785329	951.5	781.167	1.77
3721	GO:0016538	cyclin-dependent protein kinase regulator activity	44	-2.73667	0.00771074	474.167	1.99	0	1693	1083.58	-0.373333	0.956667	0.248593	1157.33	-0.8	0.215565	1424	1290.67	0.0783333
5313	GO:0044419	interaction between organisms	37	2.74667	0.00773296	463	3.89	0	149	306	3.31833	-0.853333	0.272096	1228.83	-1.25	0.12974	1118	1173.42	-1.05167
3837	GO:0015269	calcium-activated potassium channel activity	25	2.73333	0.00775555	477	3.49	0	794	635.5	3.11167	-0.02	0.452803	1876.17	0.34	0.321109	1713.5	1794.83	0.16
6266	mousepaths	Angiogenesis	218	-2.73333	0.0078182	476	3.94	0	101	288.5	0.603333	2.22333	0.0447707	490	1	0.1745	1347.5	918.75	1.61167
5883	BioCarta	Trefoil Factors Initiate Mucosal Healing	74	-2.72667	0.00788299	480.167	4.01	0	61	270.583	0.641667	1.58	0.12632	765	1.25	0.12974	1118	941.5	1.415
1550	GO:0005938	cell cortex	69	-2.72333	0.00789295	483.833	2.69	0	1538	1010.92	-0.0166667	-0.393333	0.371536	1596	-1.25	0.12974	1118	1357	-0.821667
3351	GO:0031497	chromatin assembly	103	-2.72667	0.00790413	481.333	3.58	0	651	566.167	0.426667	-2.28	0.0402086	472.5	-2.9	0	176	324.25	-2.59
1889	GO:0008283	cell proliferation	635	-2.72	0.00790542	484.833	3.72	0	383	433.917	0.5	-1.62	0.119824	742.5	-1.62	0.0884888	755	748.75	-1.62
5182	GO:0006816	calcium ion transport	203	2.73333	0.00793402	471.333	3.84	0	216	343.667	3.28667	-0.54	0.337929	1488	-1	0.180021	1275	1381.5	-0.77
618	GO:0016023	cytoplasmic membrane-bound vesicle	396	-2.72333	0.00795461	481	3.83	0	229	355	0.553333	2.68	0.0194212	312.167	-0.07	0.385304	1831.5	1071.83	1.305
2902	GO:0000060	protein-nucleus import, translocation	33	-2.71667	0.00800282	487.167	-1.78	0	1712	1099.58	-2.24833	1.99333	0.0663334	586	1.8	0	601	593.5	1.89667
6276	mousepaths	Genome Stability _ DNA Repair	225	-2.72333	0.00801242	477.667	3.25	0	1186	831.833	0.263333	0.296667	0.395883	1662.67	-1.62	0.0884888	755	1208.83	-0.661667
5223	GO:0043066	negative regulation of apoptosis	187	-2.71667	0.00808181	483.833	3.44	0	889	686.417	0.361667	2.90667	0.0124761	241.333	1.62	0.0785329	951.5	596.417	2.26333
3630	GO:0009308	amine metabolism	532	-2.71	0.00821803	485	3.74	0	359	422	0.515	-1.37	0.165701	872.167	-1.25	0.12974	1118	995.083	-1.31
6247	KEGG	Adipocytokine_signaling_pathway	157	-2.71333	0.00824208	480.167	3.39	0	984	732.083	0.338333	3.89333	0.00263882	72.8333	1.9	0	574	323.417	2.89667
2882	GO:0007169	transmembrane receptor protein tyrosine kinase signaling pathway	238	-2.70333	0.00825002	491.333	3.47	0	844	667.667	0.383333	3.54667	0.00450753	107.333	1.62	0.0785329	951.5	529.417	2.58333
4925	GO:0009893	positive regulation of metabolism	474	-2.70333	0.00831475	487.167	3.74	0	365	426.083	0.518333	-0.523333	0.341645	1501.83	-1.62	0.0884888	755	1128.42	-1.07167
5228	GO:0043069	negative regulation of programmed cell death	188	-2.69667	0.00836486	494.333	3.45	0	880	687.167	0.376667	2.89667	0.0125675	243.667	1.62	0.0785329	951.5	597.583	2.25833
2502	GO:0016278	lysine N-methyltransferase activity	33	-2.69667	0.00840274	496.167	1.78	0	1713	1104.58	-0.458333	0.723333	0.300029	1338	-2.37	0	387	862.5	-0.823333
2506	GO:0016279	protein-lysine N-methyltransferase activity	33	-2.69667	0.00840274	496.167	1.78	0	1713	1104.58	-0.458333	0.723333	0.300029	1338	-2.37	0	387	862.5	-0.823333
4692	GO:0018024	histone-lysine N-methyltransferase activity	33	-2.69667	0.00840274	496.167	1.78	0	1713	1104.58	-0.458333	0.723333	0.300029	1338	-2.37	0	387	862.5	-0.823333
2973	GO:0007178	transmembrane receptor protein serine/threonine kinase signaling pathway	161	-2.69	0.00846849	498	3.45	0	883	690.5	0.38	2.44667	0.0298465	402.667	1.25	0.12974	1118	760.333	1.84833
6214	KEGG	RNA_polymerase	44	-2.69333	0.00848101	492.667	1.96	0	1696	1094.33	-0.366667	-3.08	0.00928411	186.667	-3.15	0	117	151.833	-3.115
6122	KEGG	Pyrimidine_metabolism	179	-2.69333	0.00852414	491.5	3.08	0	1345	918.25	0.193333	-5.75667	0	37	-3.63	0	38	37.5	-4.69333
5149	GO:0015630	microtubule cytoskeleton	542	-2.68667	0.00856261	499.667	3.49	0	802	650.833	0.401667	-2.52333	0.0261095	369.833	-1.62	0.0884888	755	562.417	-2.07167
5939	BioCarta	Ceramide Signaling Pathway	47	-2.69	0.00857881	492.667	2.93	0	1451	971.833	0.12	1.31333	0.176857	904.667	1.62	0.0785329	951.5	928.083	1.46667
3078	GO:0031325	positive regulation of cellular metabolism	467	-2.68667	0.0086105	497.5	3.76	0	336	416.75	0.536667	-0.49	0.347716	1528	-1.62	0.0884888	755	1141.5	-1.055
1469	GO:0005923	tight junction	131	2.68667	0.00861595	499.667	3.58	0	650	574.833	3.13333	-0.776667	0.287215	1295.33	-1.62	0.0884888	755	1025.17	-1.19833
2092	GO:0008203	cholesterol metabolism	112	-2.68	0.00867813	500.667	2.69	0	1539	1019.83	0.005	2.81333	0.0149043	270.667	2.57	0	304	287.333	2.69167
5705	GO:0003690	double-stranded DNA binding	35	-2.67667	0.00872799	503.333	1.85	0	1707	1105.17	-0.413333	0.2	0.416351	1733.17	-0.8	0.215565	1424	1578.58	-0.3
6224	KEGG	Cell_cycle	242	-2.67333	0.00872904	506.333	3.24	0	1203	854.667	0.283333	-2.58	0.0237998	347.167	-2.38	0	385	366.083	-2.48
269	GO:0005839	proteasome core complex (sensu Eukaryota)	37	-2.67333	0.00881532	506.667	2.99	0	1405	955.833	0.158333	1.58	0.126604	766.833	-1	0.180021	1275	1020.92	0.29
294	GO:0008026	ATP-dependent helicase activity	190	-2.66667	0.00889356	506.833	3.11	0	1323	914.917	0.221667	-1.26	0.187223	941.833	-1.98	0	552	746.917	-1.62
5193	GO:0000785	chromatin	273	-2.67	0.00893109	506.5	3.54	0	725	615.75	0.435	-0.156667	0.424721	1776.17	-1	0.180021	1275	1525.58	-0.578333
934	GO:0001727	lipid kinase activity	63	-2.66333	0.00893351	508.5	0.8	0.0229084	1825	1166.75	-0.931667	0.603333	0.325001	1430.33	-0.07	0.385304	1831.5	1630.92	0.266667
2479	GO:0016289	CoA hydrolase activity	20	-2.66333	0.00898176	509.5	-4.01	0	60	284.75	-3.33667	-0.826667	0.277746	1253	-2.55	0	316	784.5	-1.68833
3495	GO:0004298	threonine endopeptidase activity	40	-2.66333	0.00898683	510	2.99	0	1403	956.5	0.163333	1.27	0.185849	935.333	-1	0.180021	1275	1105.17	0.135
5111	GO:0005478	intracellular transporter activity	41	-2.66333	0.00904946	512.5	2.55	0	1592	1052.25	-0.0566667	-0.313333	0.392102	1651.33	-1.62	0.0884888	755	1203.17	-0.966667
2975	GO:0007179	transforming growth factor beta receptor signaling pathway	104	-2.66	0.00905217	511.833	3.24	0	1202	856.917	0.29	-0.296667	0.395632	1660.83	-1.25	0.12974	1118	1389.42	-0.773333
4437	GO:0045934	negative regulation of nucleobase, nucleoside, nucleotide and nucleic acid metabolism	373	-2.66	0.00906874	511.833	3.55	0	693	602.417	0.445	0.76	0.291855	1307	-1.25	0.12974	1118	1212.5	-0.245
307	GO:0008015	circulation	72	2.65667	0.00908696	514.667	3.32	0	1098	806.333	2.98833	-2.24	0.0431866	483	-2.27	0	445	464	-2.255
4735	GO:0000178	exosome (RNase complex)	22	-2.65667	0.00908766	513.167	1.62	0.00590046	1753.5	1133.33	-0.518333	-2.36	0.0347686	439.5	-3.41	0	72	255.75	-2.885
196	GO:0005874	microtubule	362	-2.65667	0.00912446	513.667	3.5	0	782	647.833	0.421667	-2.64333	0.0210592	326.167	-1.62	0.0884888	755	540.583	-2.13167
6201	KEGG	Limonene_and_pinene_degradation	43	-2.65333	0.00912963	513.833	2.62	0	1559	1036.42	-0.0166667	3.06	0.0098377	188	3.17	0	111	149.5	3.115
2737	GO:0004467	long-chain-fatty-acid-CoA ligase activity	20	-2.65667	0.00914397	513.167	-1.64	0.00609756	1723	1118.08	-2.14833	3.27667	0.00661097	135.167	3.71	0	24	79.5833	3.49333
1548	GO:0046530	photoreceptor cell differentiation	27	2.65667	0.00916793	515.333	3.98	0	74	294.667	3.31833	1.00333	0.238731	1122.17	1.62	0.0785329	951.5	1036.83	1.31167
3923	GO:0005070	SH3/SH2 adaptor activity	22	-2.65	0.00917567	518.333	-3.77	0	315	416.667	-3.21	-0.3	0.395017	1660	-2.17	0	497	1078.5	-1.235
455	GO:0006917	induction of apoptosis	186	-2.65333	0.00922558	514.5	4.01	0	62	288.25	0.678333	2.92333	0.0122439	234	1.62	0.0785329	951.5	592.75	2.27167
5106	GO:0012502	induction of programmed cell death	186	-2.65333	0.00922558	514.5	4.01	0	62	288.25	0.678333	2.92333	0.0122439	234	1.62	0.0785329	951.5	592.75	2.27167
3428	GO:0007271	synaptic transmission, cholinergic	23	2.65333	0.00925429	516.5	4	0	66	291.25	3.32667	-1.02	0.235829	1111	-0.8	0.215565	1424	1267.5	-0.91
2405	GO:0004386	helicase activity	295	-2.64333	0.00928978	520.667	3.1	0	1332	926.333	0.228333	-1.08	0.221186	1072.67	-1.62	0.0884888	755	913.833	-1.35
575	GO:0003924	GTPase activity	286	-2.64	0.00940676	518.5	3.76	0	333	425.75	0.56	-0.55	0.33551	1474.33	-1.62	0.0884888	755	1114.67	-1.085
6239	KEGG	Toll-like_receptor_signaling_pathway	201	-2.64	0.00942874	520.5	3.47	0	831	675.75	0.415	1.19667	0.197455	997.333	-1	0.180021	1275	1136.17	0.0983333
1605	GO:0042157	lipoprotein metabolism	113	-2.63667	0.00945927	524	2.76	0	1514	1019	0.0616667	2.23667	0.0436276	486.5	1.62	0.0785329	951.5	719	1.92833
564	GO:0016055	Wnt receptor signaling pathway	220	-2.63333	0.00947919	522.667	3.68	0	469	495.833	0.523333	3.25	0.0067927	142	1.62	0.0785329	951.5	546.75	2.435
851	GO:0008374	O-acyltransferase activity	49	-2.62667	0.00970657	526.833	1.9	0	1703	1114.92	-0.363333	1.15	0.207194	1028	0.63	0.252459	1550.5	1289.25	0.89
5159	GO:0006825	copper ion transport	27	-2.62333	0.00973787	529	0.8	0.0229084	1825	1177	-0.911667	3.23	0.00695901	146.167	3.19	0	107	126.583	3.21
3779	GO:0051187	cofactor catabolism	68	-2.61667	0.00978251	533.5	3	0	1399	966.25	0.191667	2.40667	0.0316447	420	1.62	0.0785329	951.5	685.75	2.01333
5156	GO:0003702	RNA polymerase II transcription factor activity	141	2.63	0.00981553	523	3.91	0	128	325.5	3.27	-1.85667	0.0834329	636	-1.62	0.0884888	755	695.5	-1.73833
1302	GO:0001843	neural tube closure	31	-2.62667	0.00983914	528	1.64	0.00609433	1724	1126	-0.493333	0.673333	0.309887	1371	-3.04	0	141	756	-1.18333
2419	GO:0019205	nucleobase, nucleoside, nucleotide kinase activity	73	-2.61667	0.00985322	532	2.83	0	1495	1013.5	0.106667	-1.34	0.171642	888.667	-1.62	0.0884888	755	821.833	-1.48
1116	GO:0007010	cytoskeleton organization and biogenesis	859	-2.61333	0.00987714	532.833	3.53	0	749	640.917	0.458333	-3.29	0.00672605	127.5	-1.62	0.0884888	755	441.25	-2.455
501	GO:0006904	vesicle docking during exocytosis	44	-2.61333	0.00992961	535.667	2.66	0	1550	1042.83	0.0233333	3.04	0.00983313	198.667	3.42	0	71	134.833	3.23
4703	GO:0048278	vesicle docking	44	-2.61333	0.00992961	535.667	2.66	0	1550	1042.83	0.0233333	3.04	0.00983313	198.667	3.42	0	71	134.833	3.23
1175	GO:0030118	clathrin coat	79	-2.61333	0.00993788	534	3.92	0	119	326.5	0.653333	1.61667	0.120274	745.167	-0.8	0.215565	1424	1084.58	0.408333
3147	GO:0019843	rRNA binding	32	-2.61333	0.00995027	536.167	-1.25	0.0116279	1788.5	1162.33	-1.93167	0.993333	0.240198	1129	0.48	0.289867	1608	1368.5	0.736667
